# Supplementary material for: A new vinyl selenone-based domino approach to spirocyclopropyl oxindoles endowed with anti-HIV RT activity
Source: Royal Society of Chemistry journal article supplement (doi:10.1039/c5ob02451j), 2016-01-01

## A New Vinyl Selenone-Based Domino Approach to Spirocyclopropyl Oxindoles Endowed with Anti-HIV RT Activity

M. Palomba,<sup>a</sup> L. Rossi,<sup>a</sup> L. Sancineto,<sup>a</sup> E. Tramontano,<sup>c</sup> A. Corona,<sup>c</sup> L. Bagnoli,<sup>a</sup> C. Santi,<sup>a</sup> C. Pannecouque,<sup>b</sup> O. Tabarrini,<sup>a</sup> F. Marini<sup>a\*</sup>

*a. Dipartimento di Scienze Farmaceutiche, Università degli Studi di Perugia, Via del Liceo 1, 06123 Perugia, Italy.*

*b. KU Leuven, Department of Microbiology and Immunology, Laboratory of Virology and Chemotherapy, Rega Institute for Medical Research, B-3000 Leuven, Belgium.*

*c. Dipartimento di Scienze della Vita e dell'Ambiente, Cittadella Universitaria di Monserrato SS554 – 09042, Monserrato (Cagliari)*

### Supporting information contents

|                                           |     |
|-------------------------------------------|-----|
| <b>NMR Spectra</b> .....                  | S2  |
| <b>HETCOR and NOESY experiments</b> ..... | S23 |

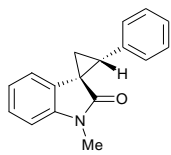

3a d.r. 93:7

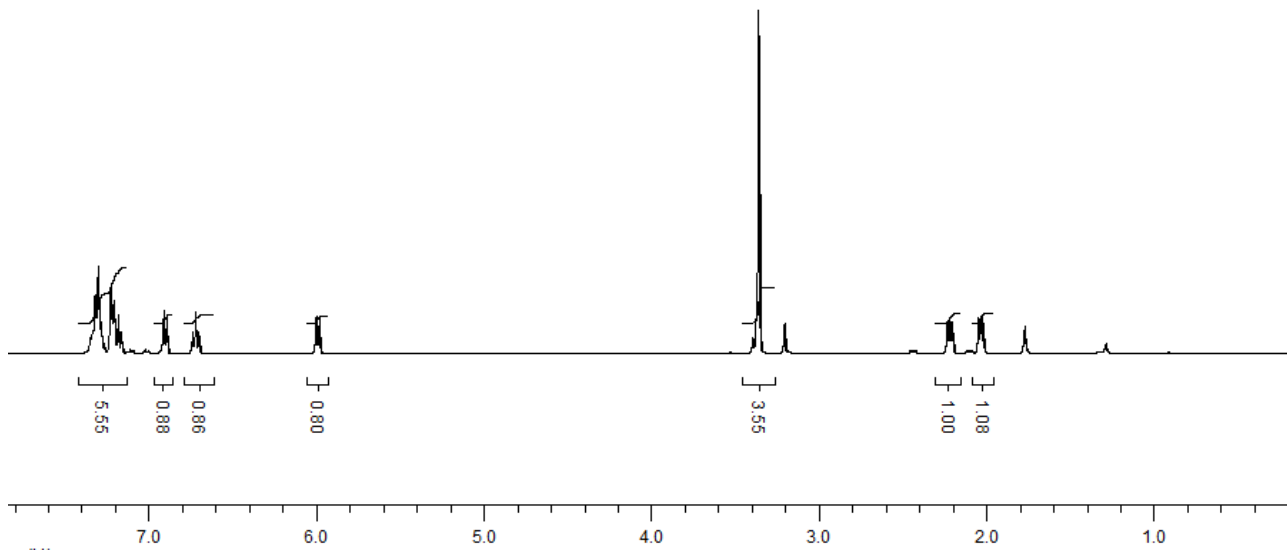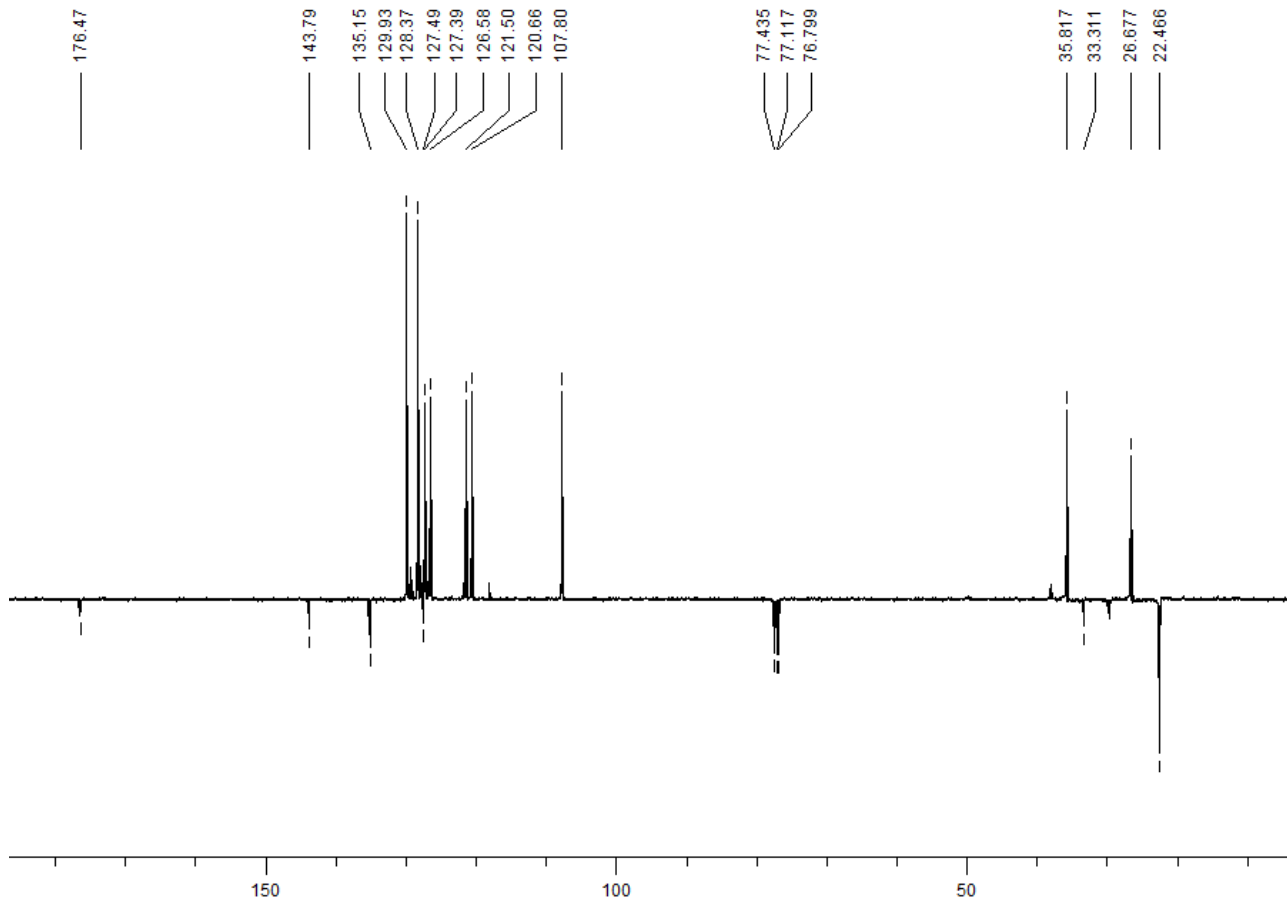

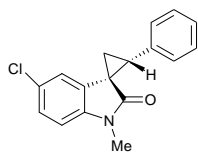

**3b** d.r. 94:6

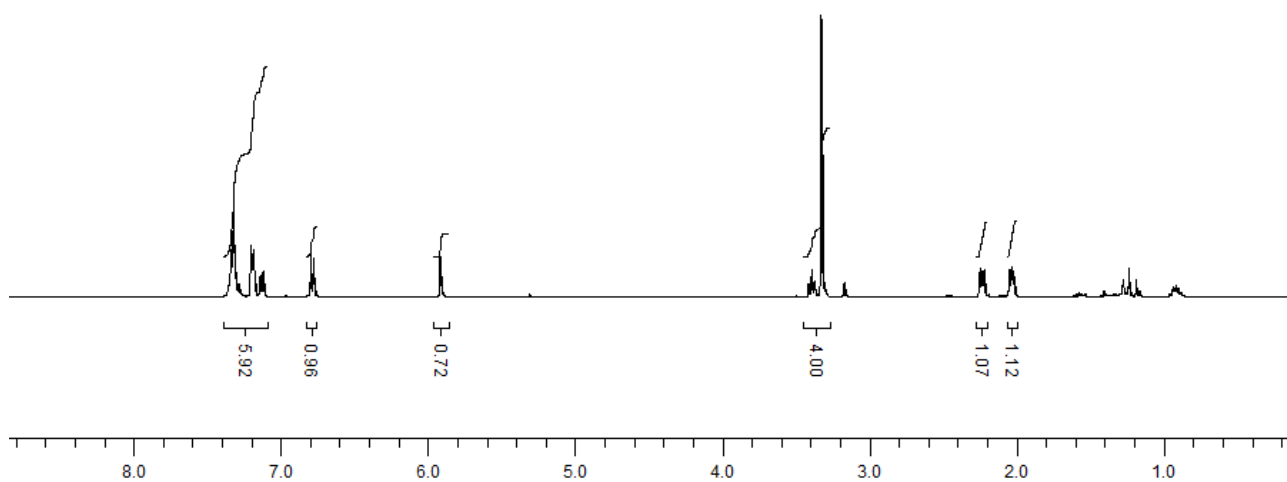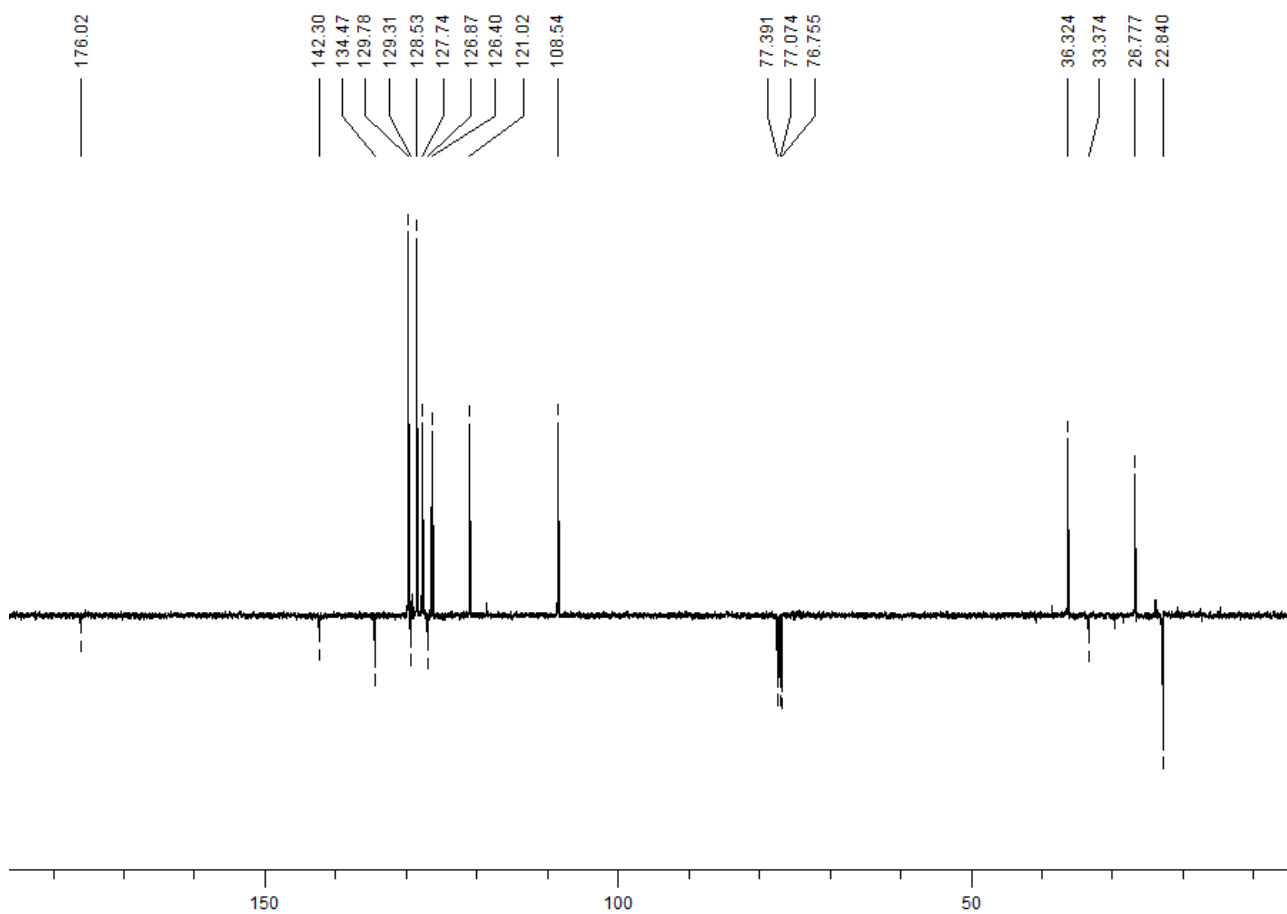

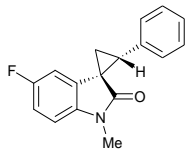

3c d.r. 96:4

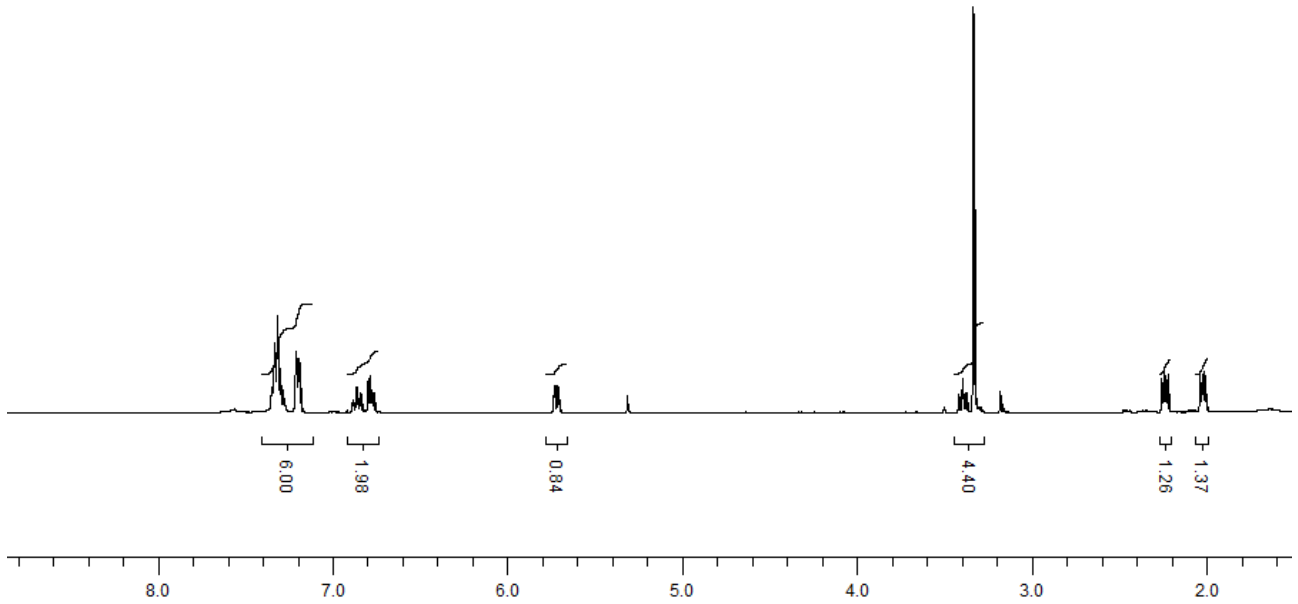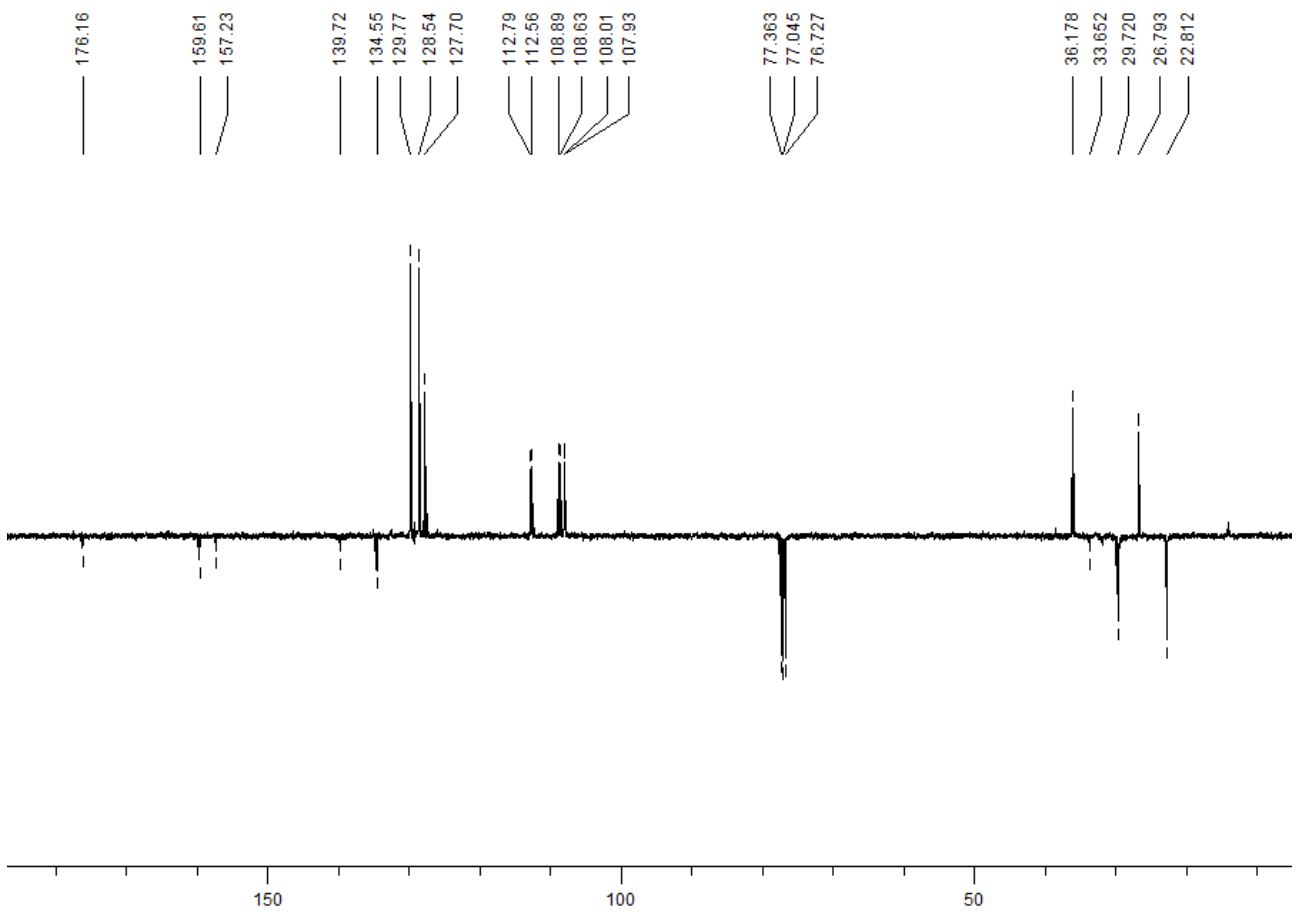

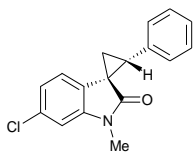

3d d.r.>99:1

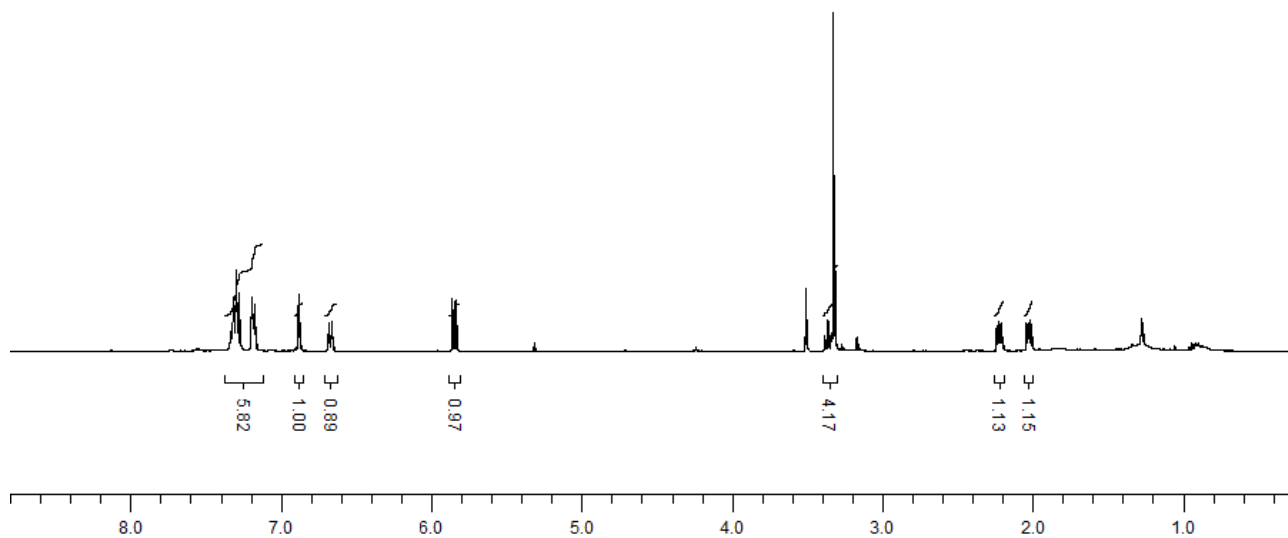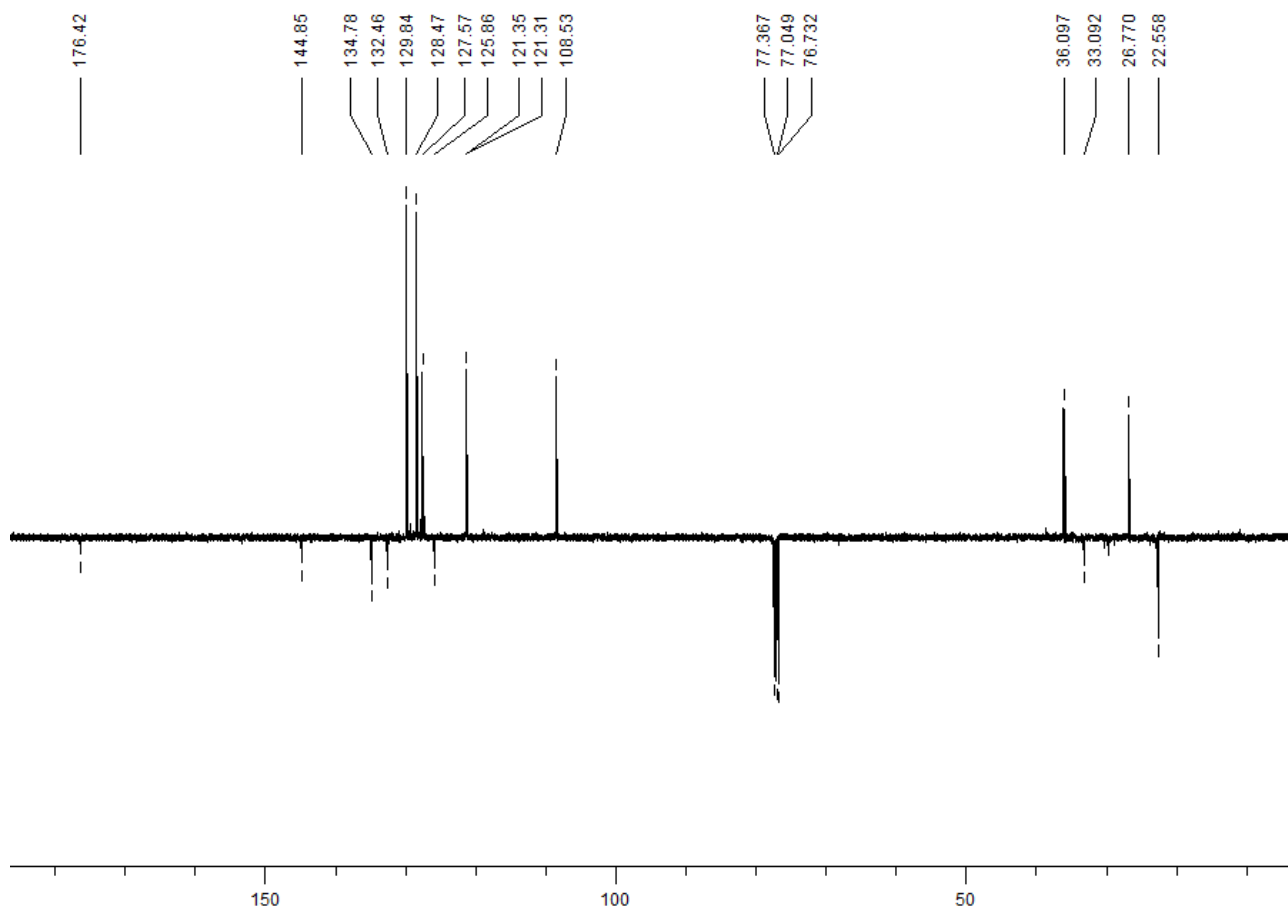

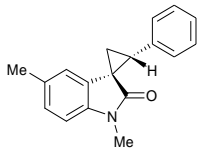

3e d.r. 90:10

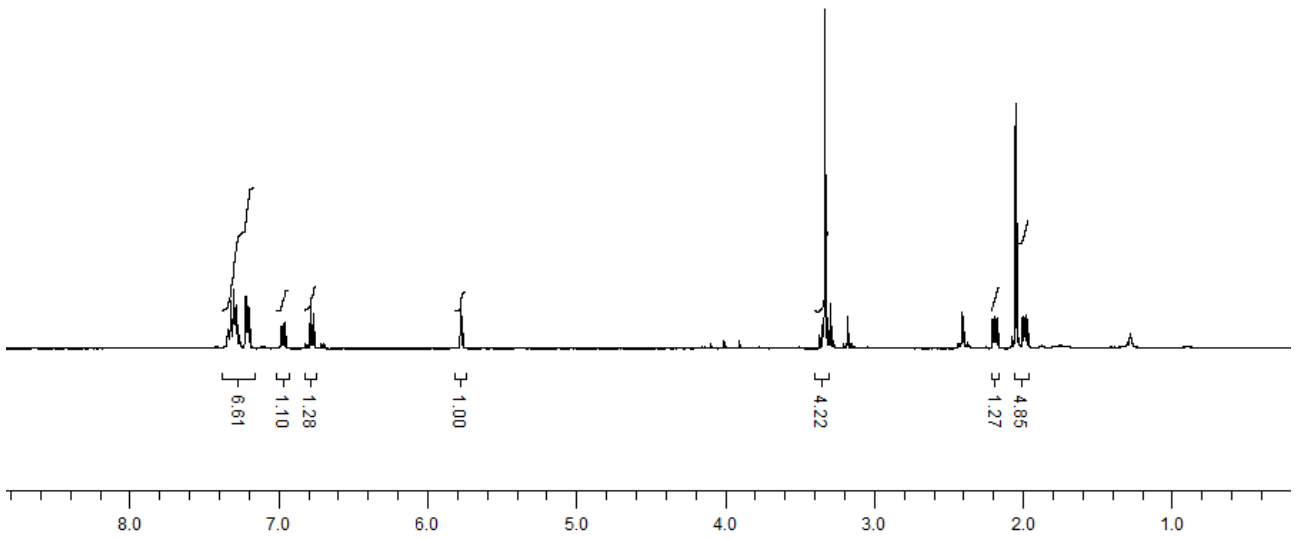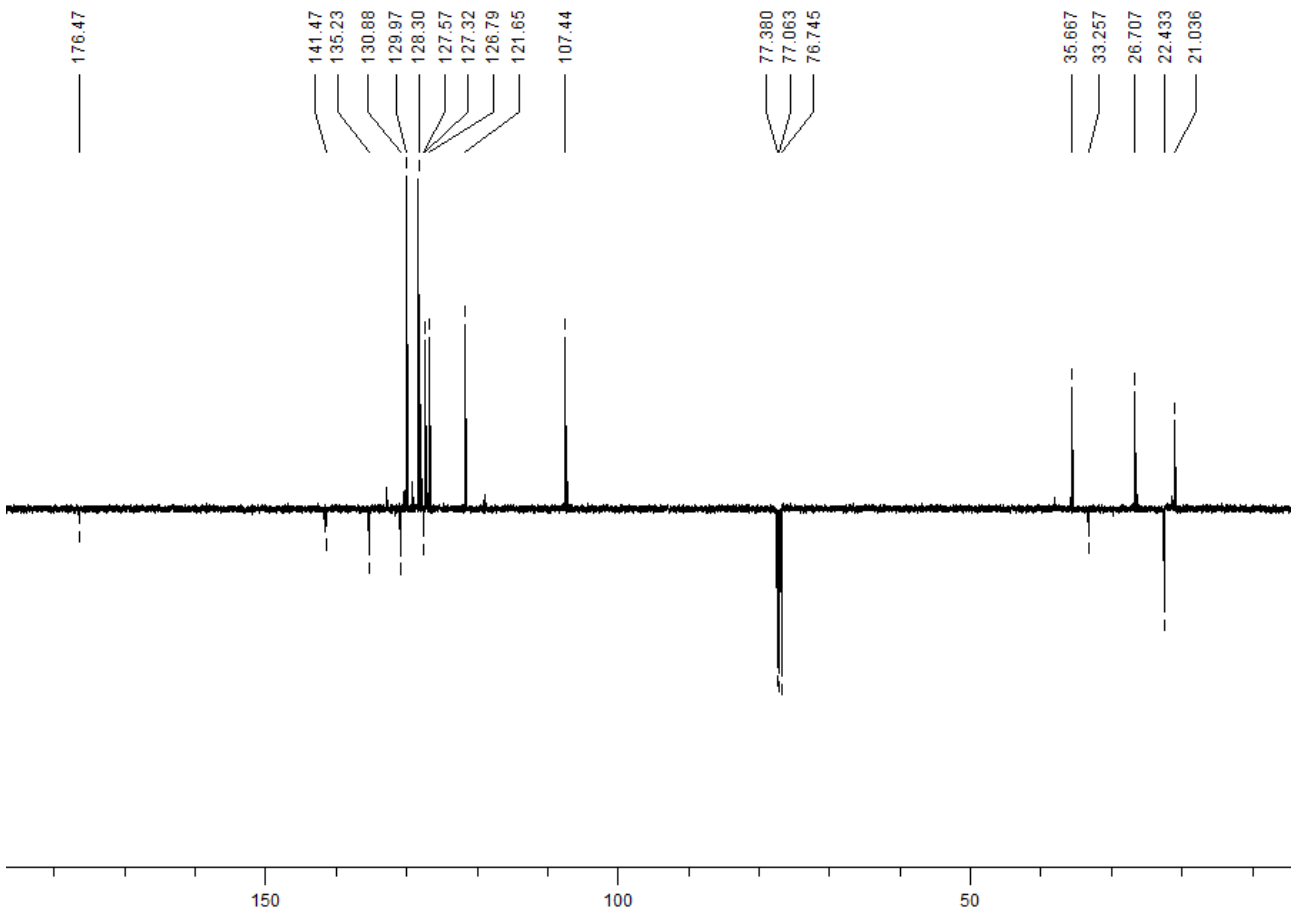

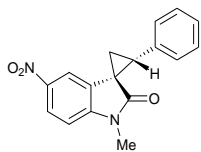

3f d.r. 98:2

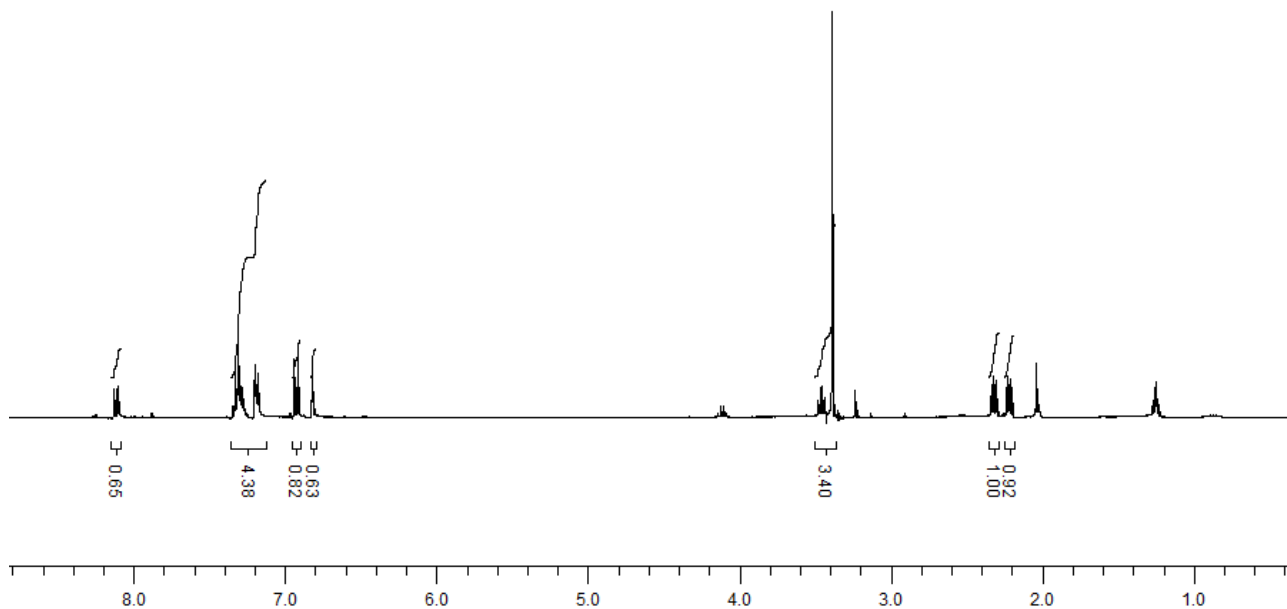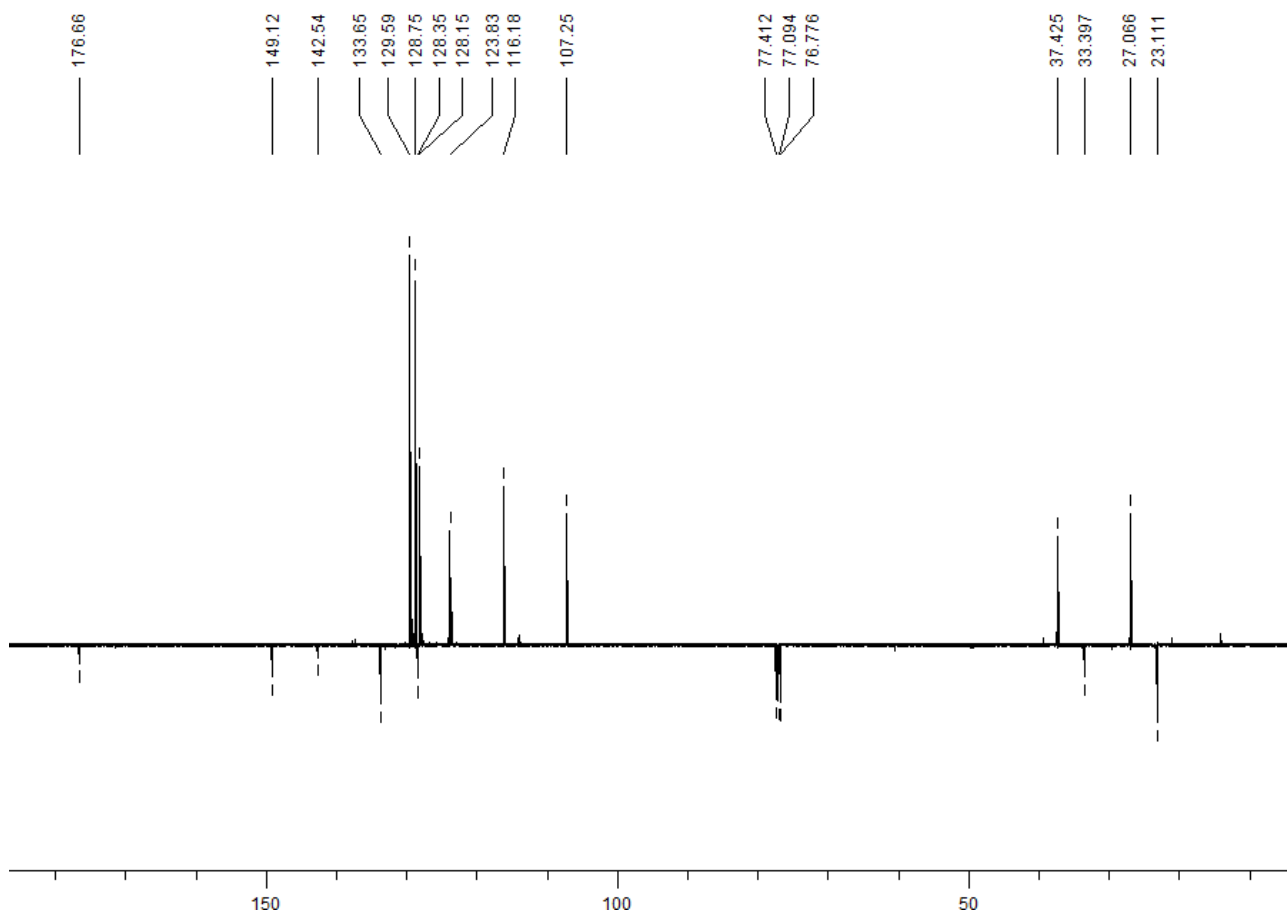

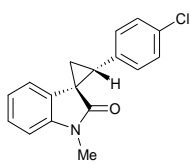

3g d.r.>99:1

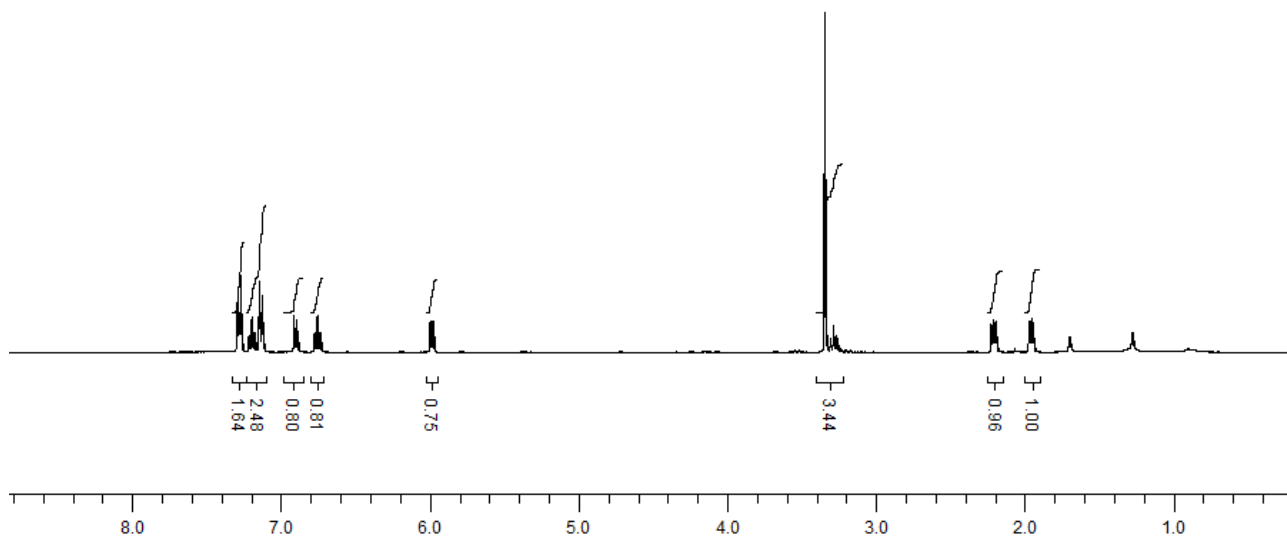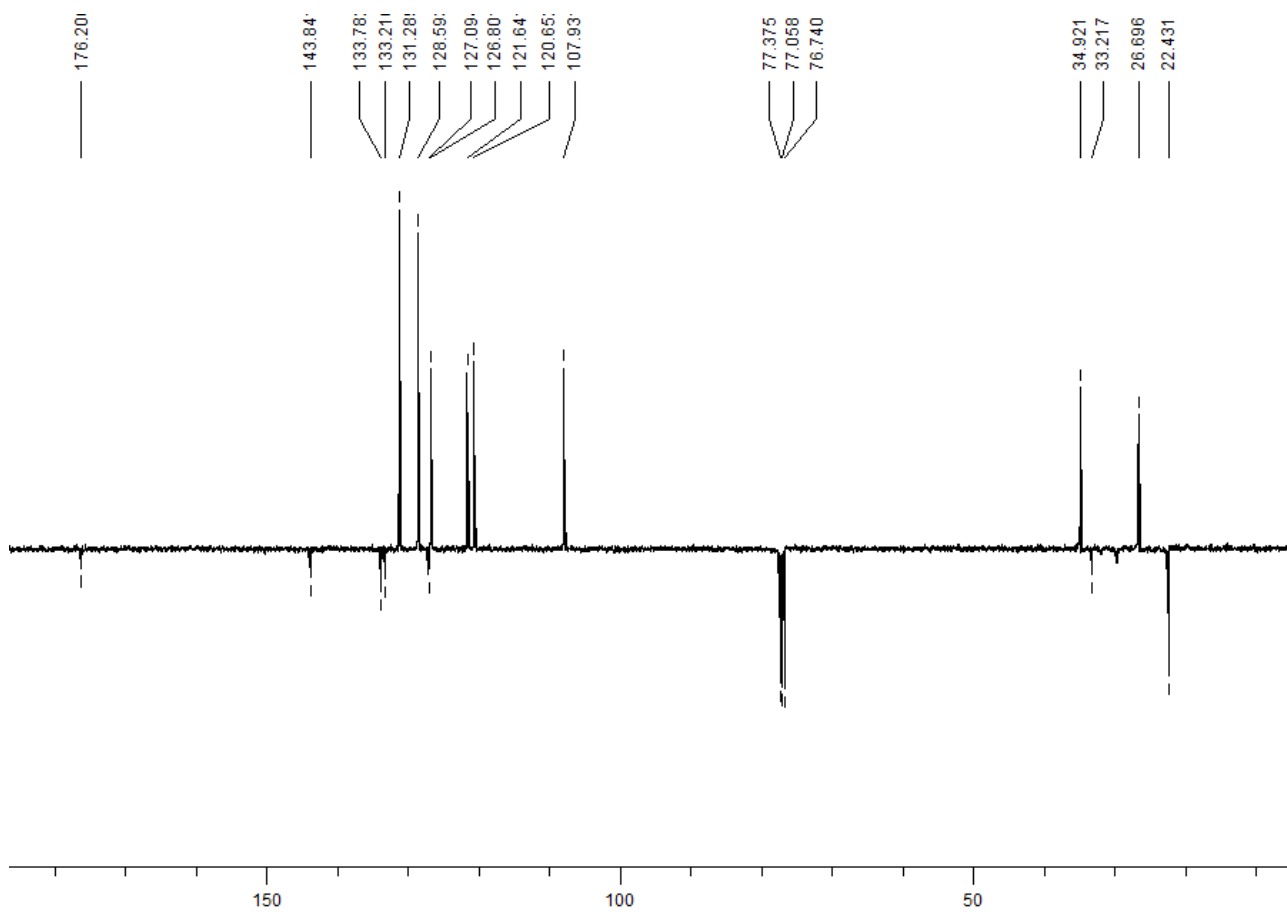



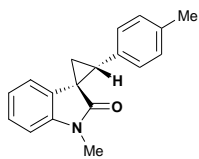

3h d.r. 96:4

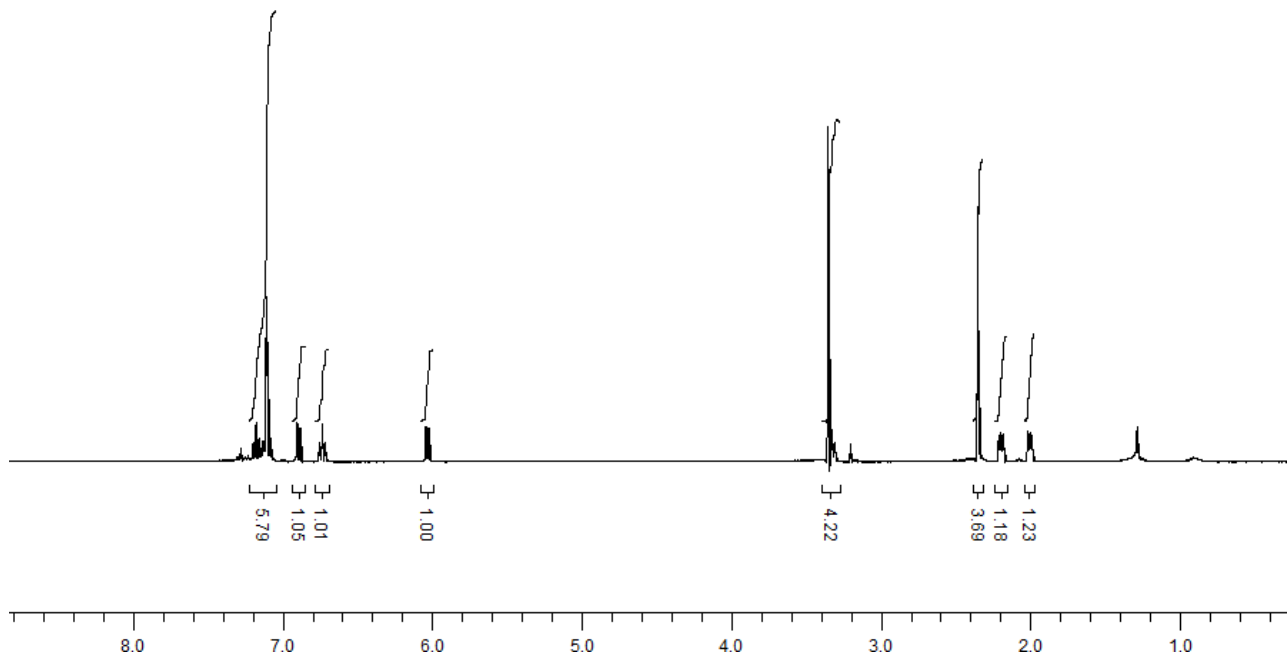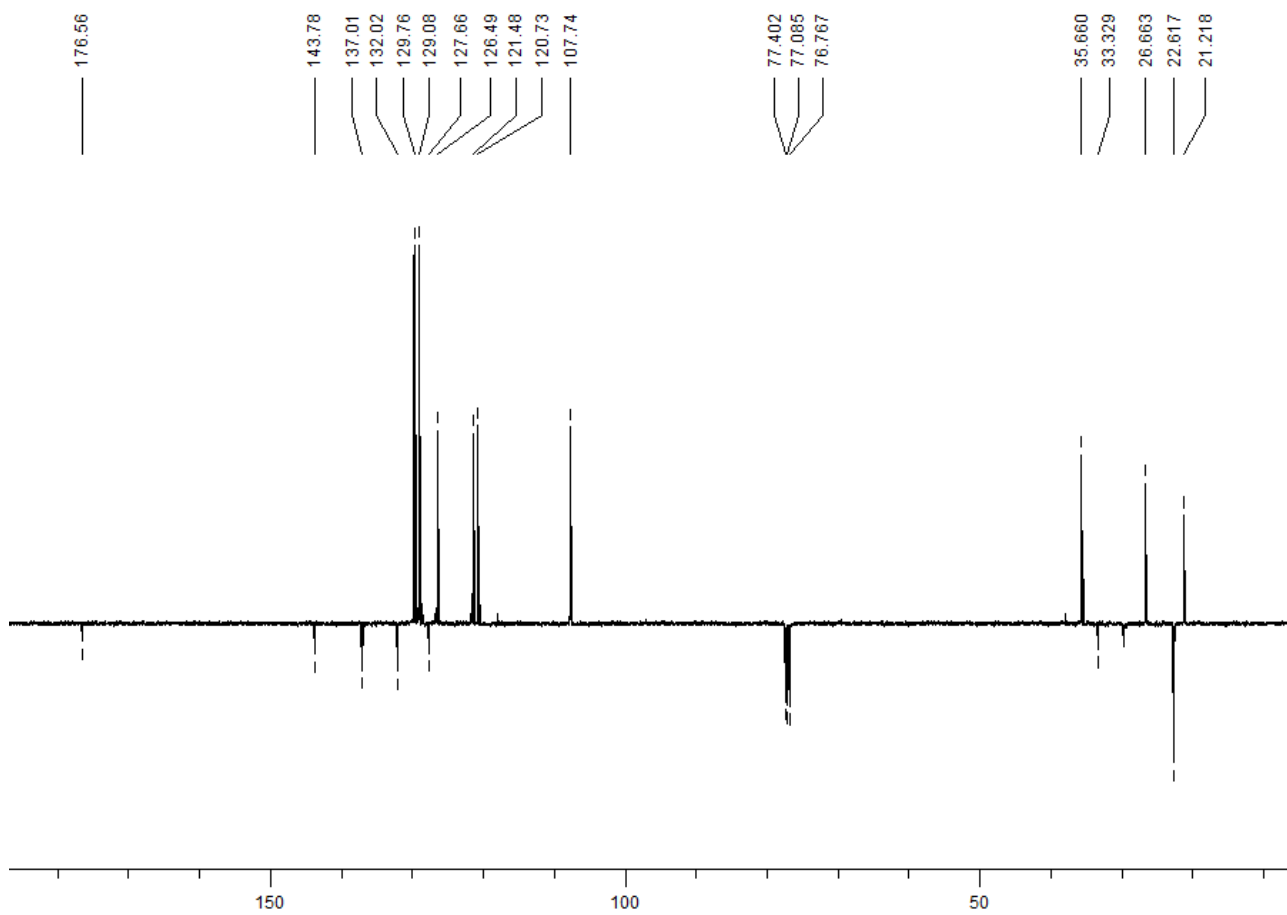

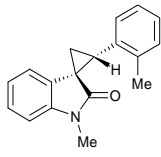

3i d.r. 92:8

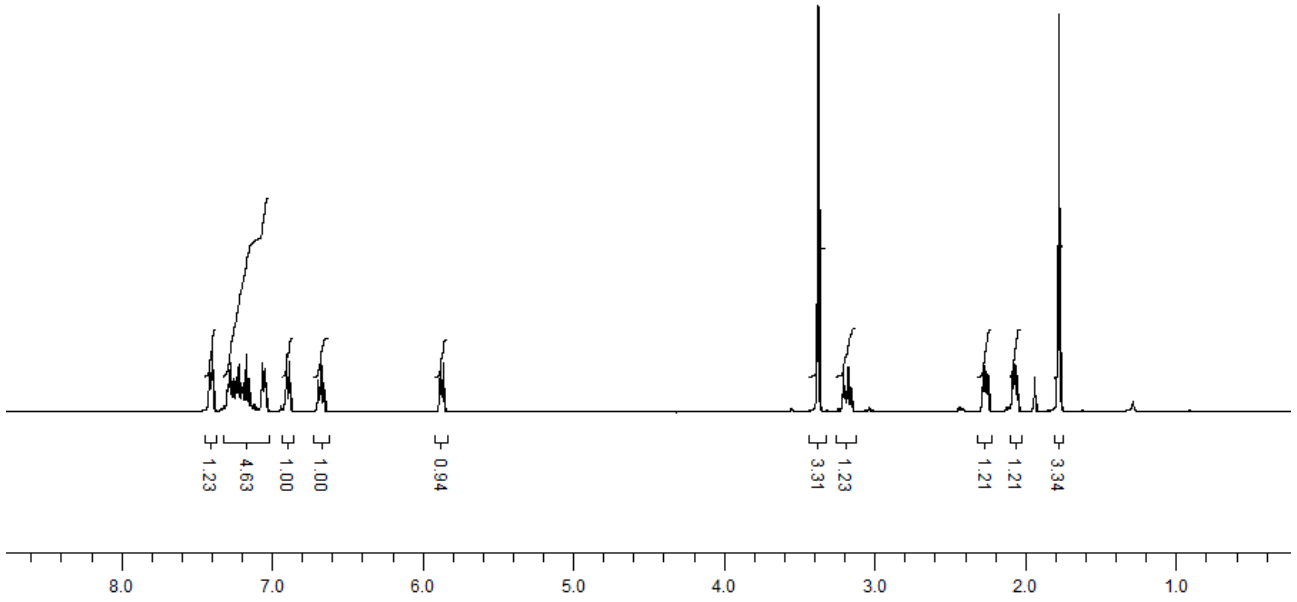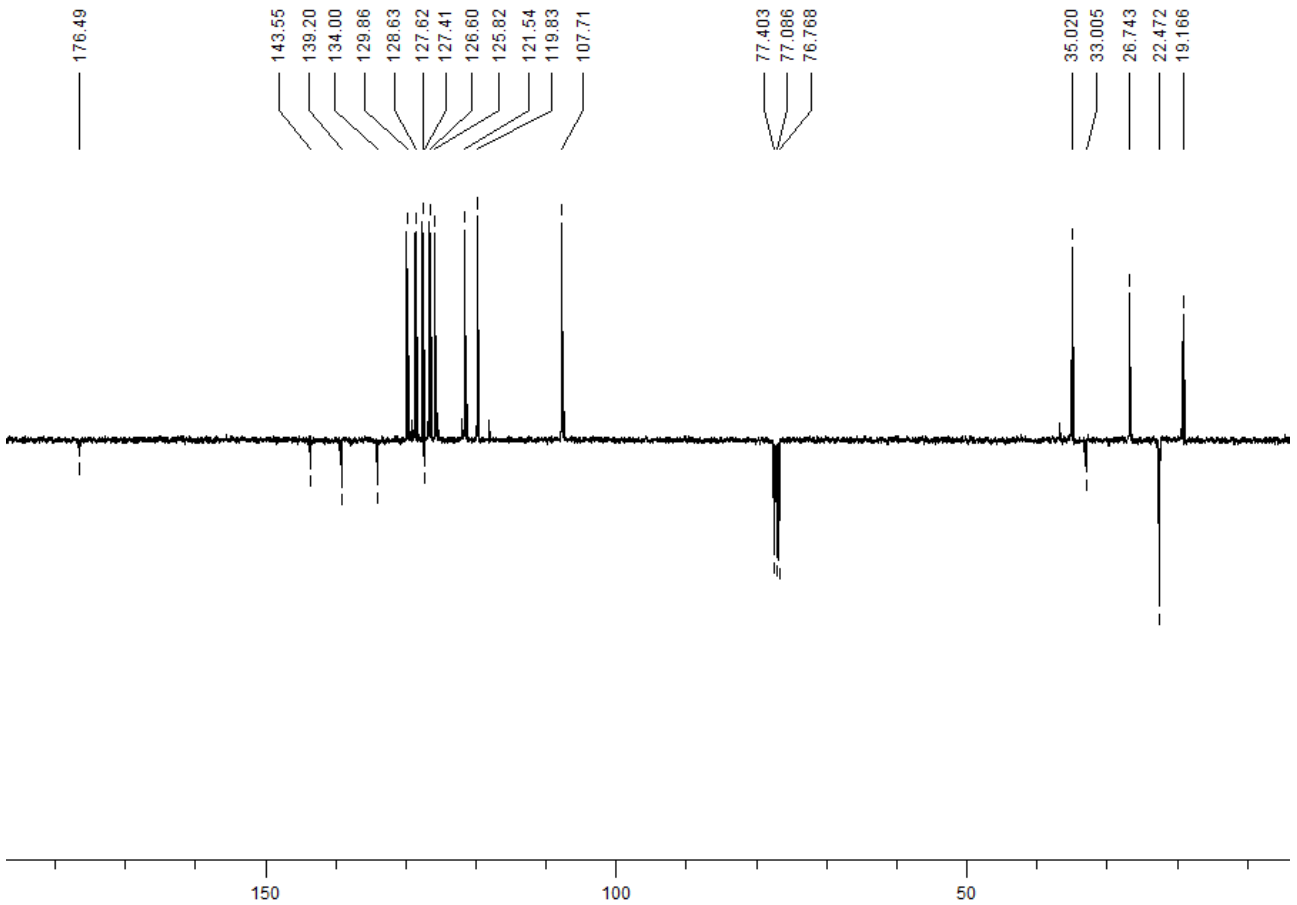

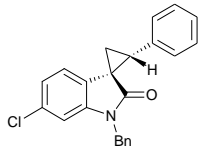

3j d.r. 91:9

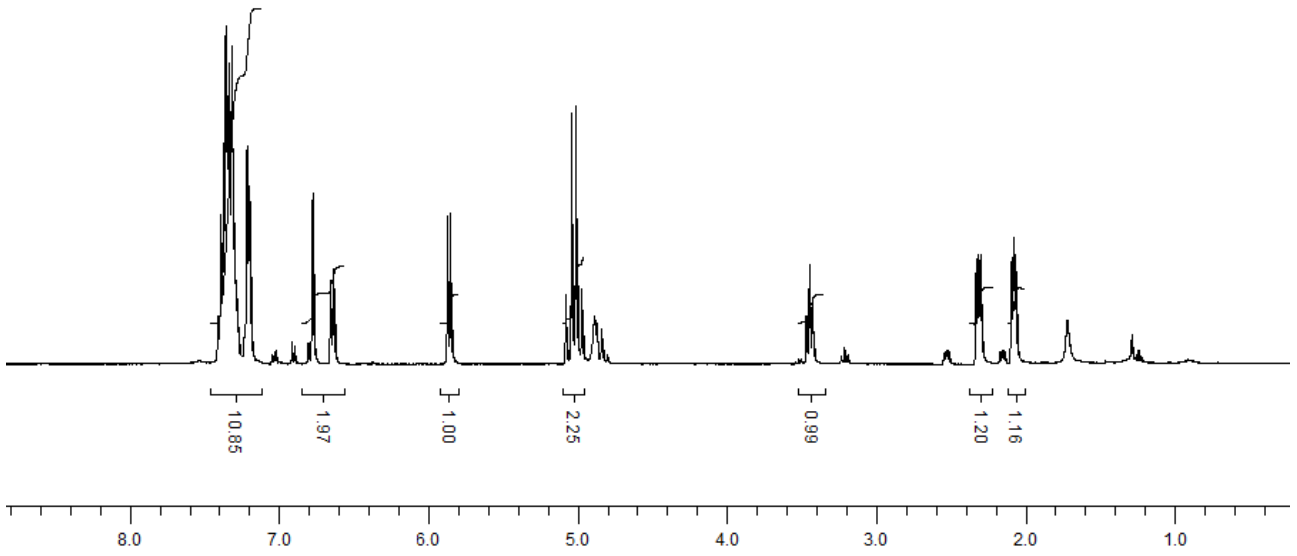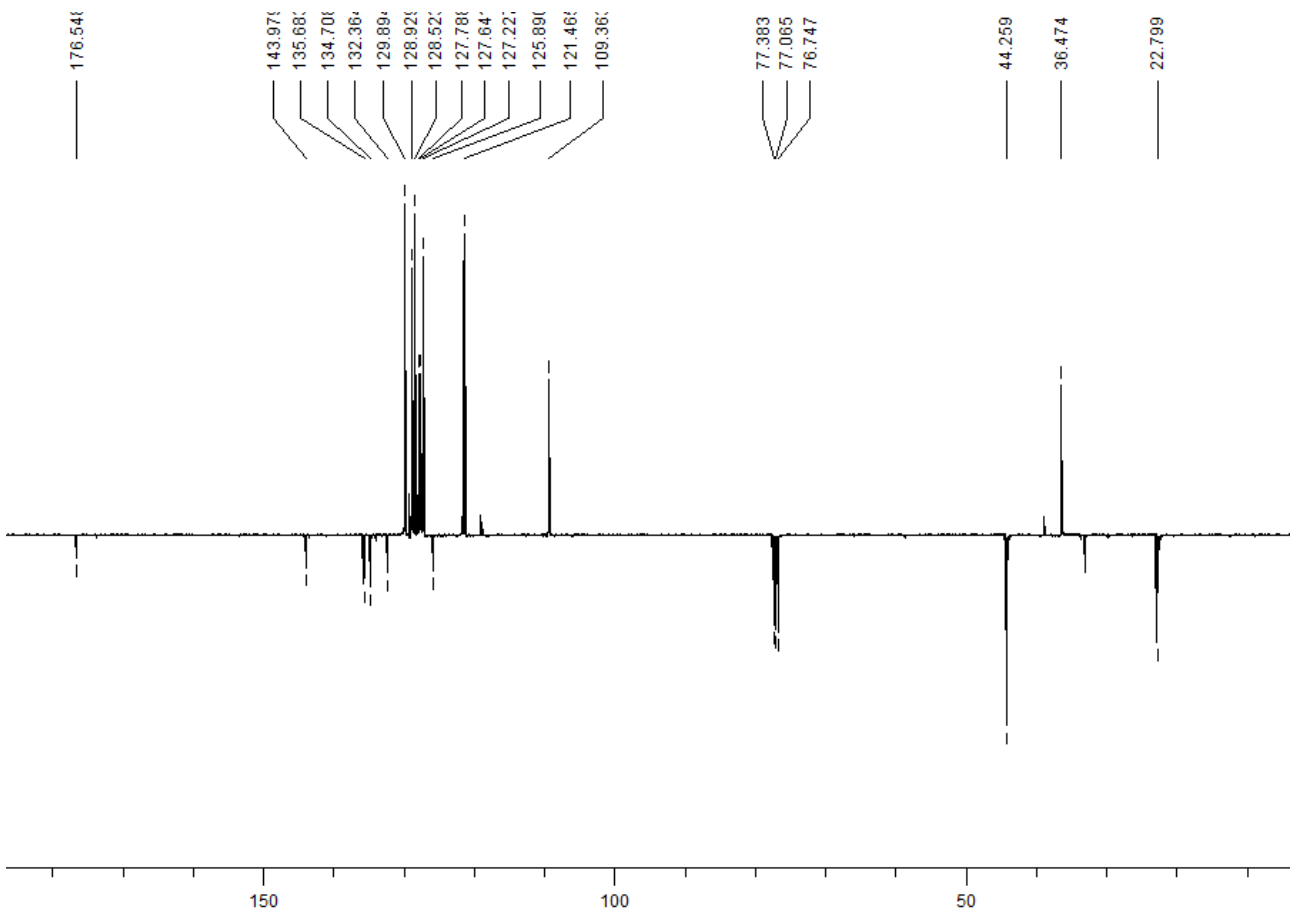

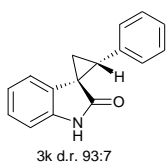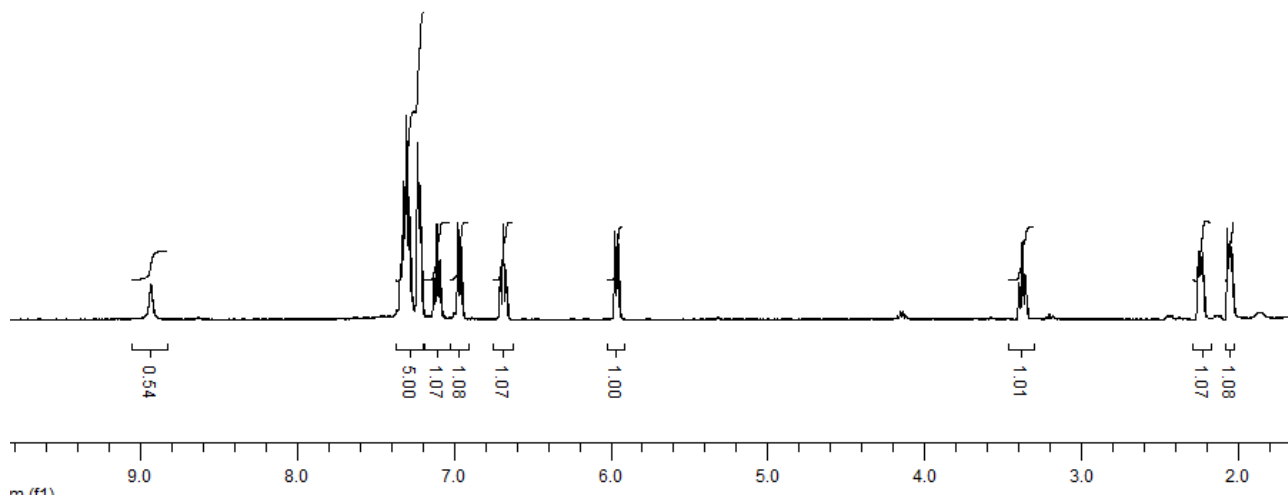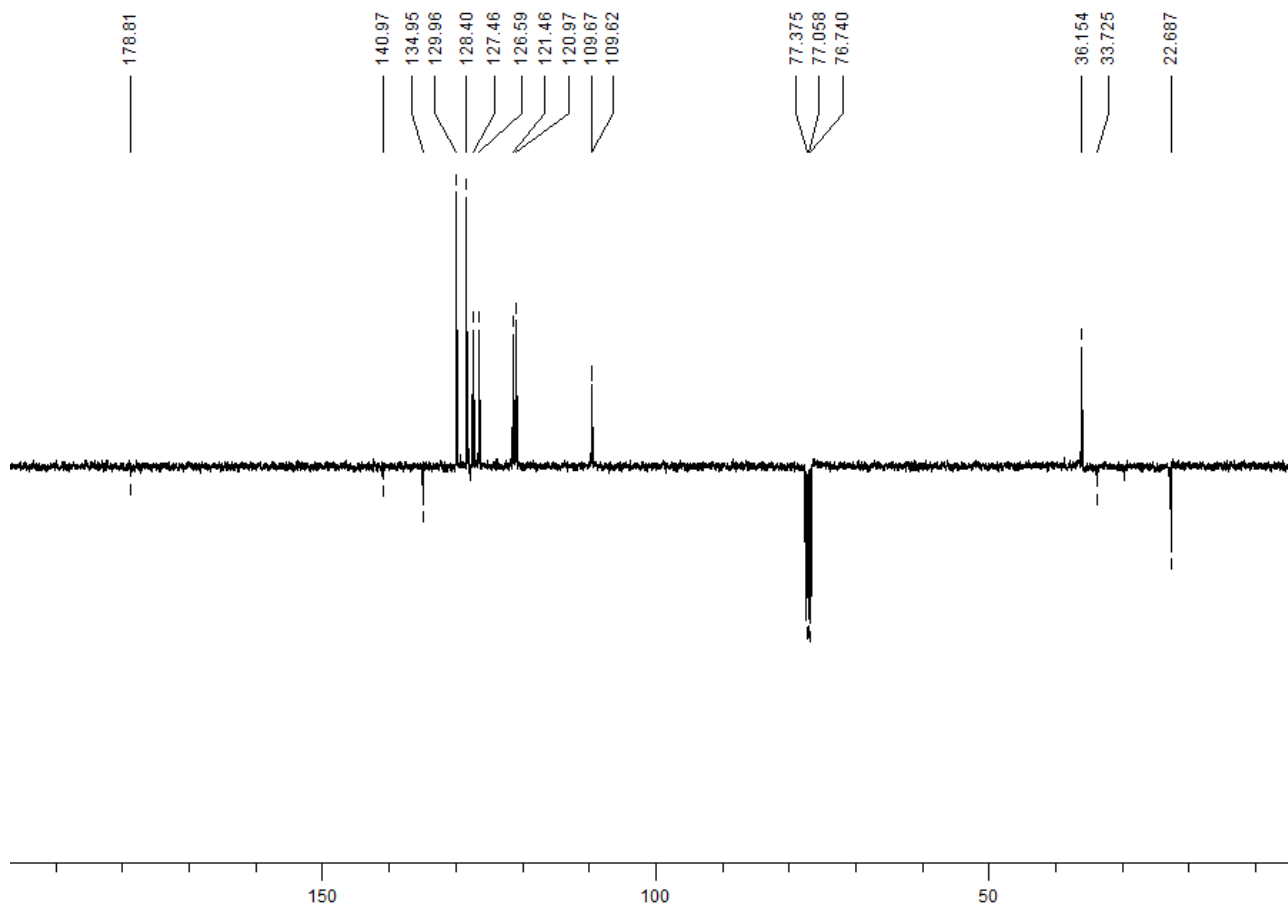

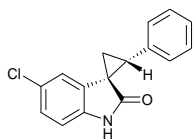

31 d.r.>99:1

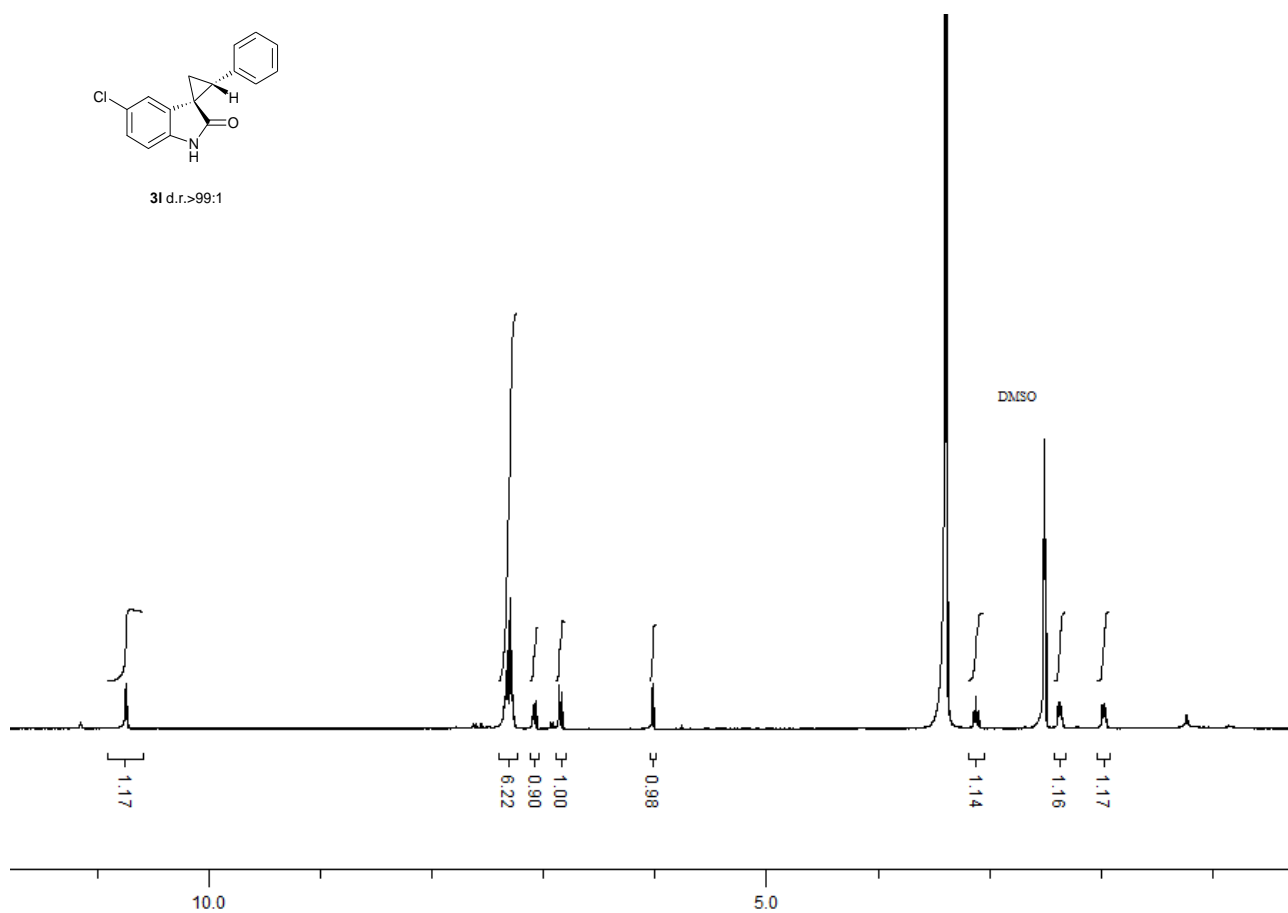

176.98

141.47  
134.78  
130.12  
130.07  
128.77  
127.89  
126.68  
124.89  
120.99  
110.90

40.530  
40.321  
40.113  
39.904  
39.696  
39.487  
39.278  
36.536  
34.362  
21.253

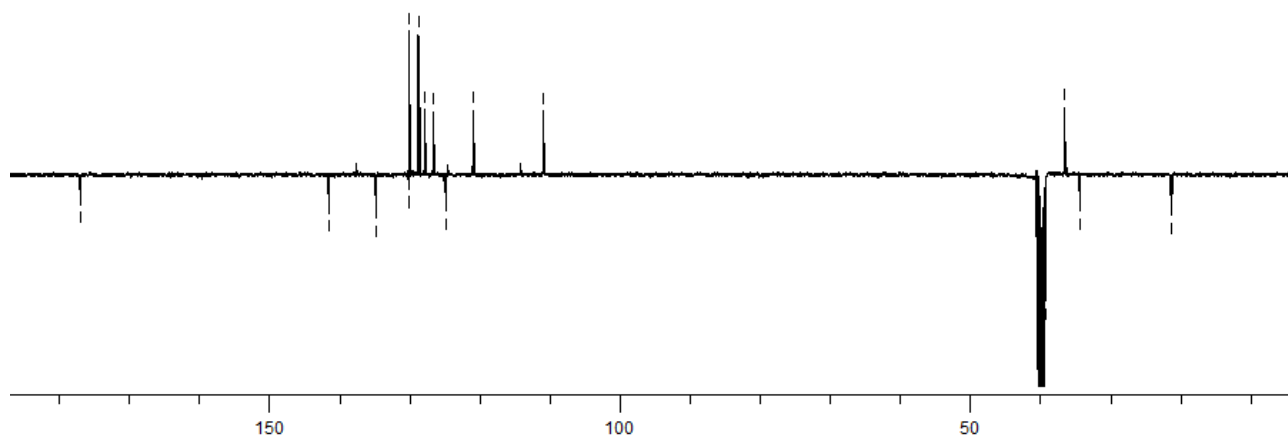

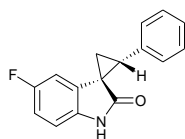

3m d.r.>99:1

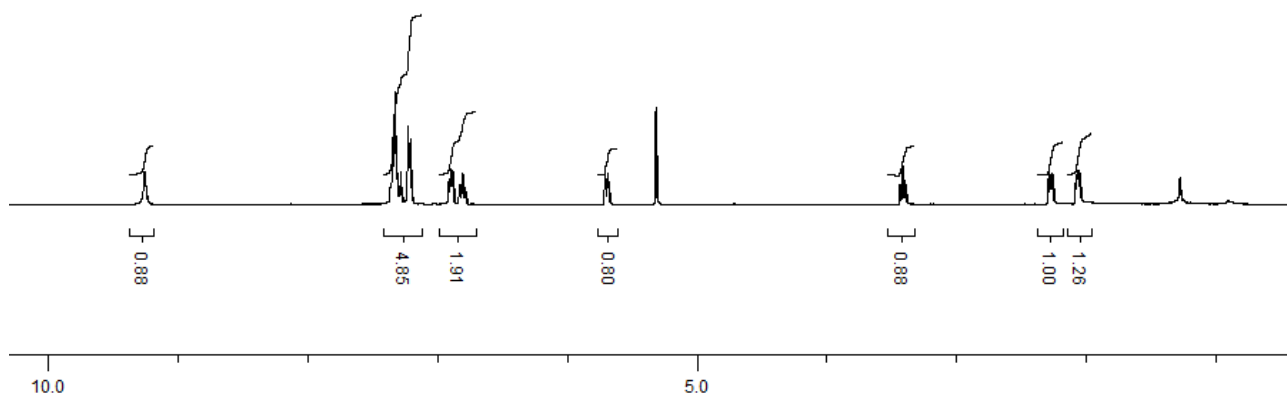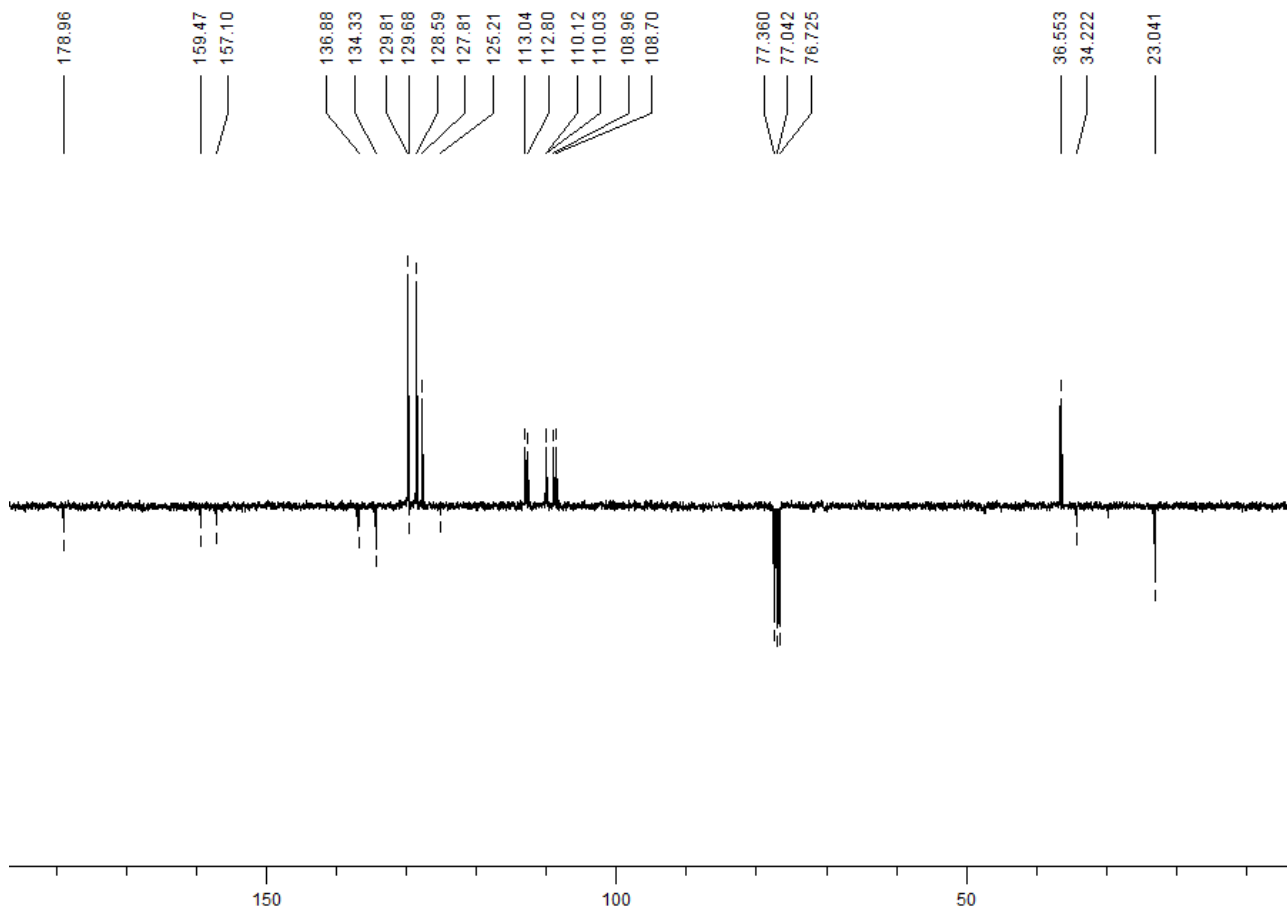

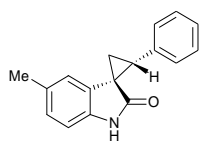

**3n** d.r. 98:2

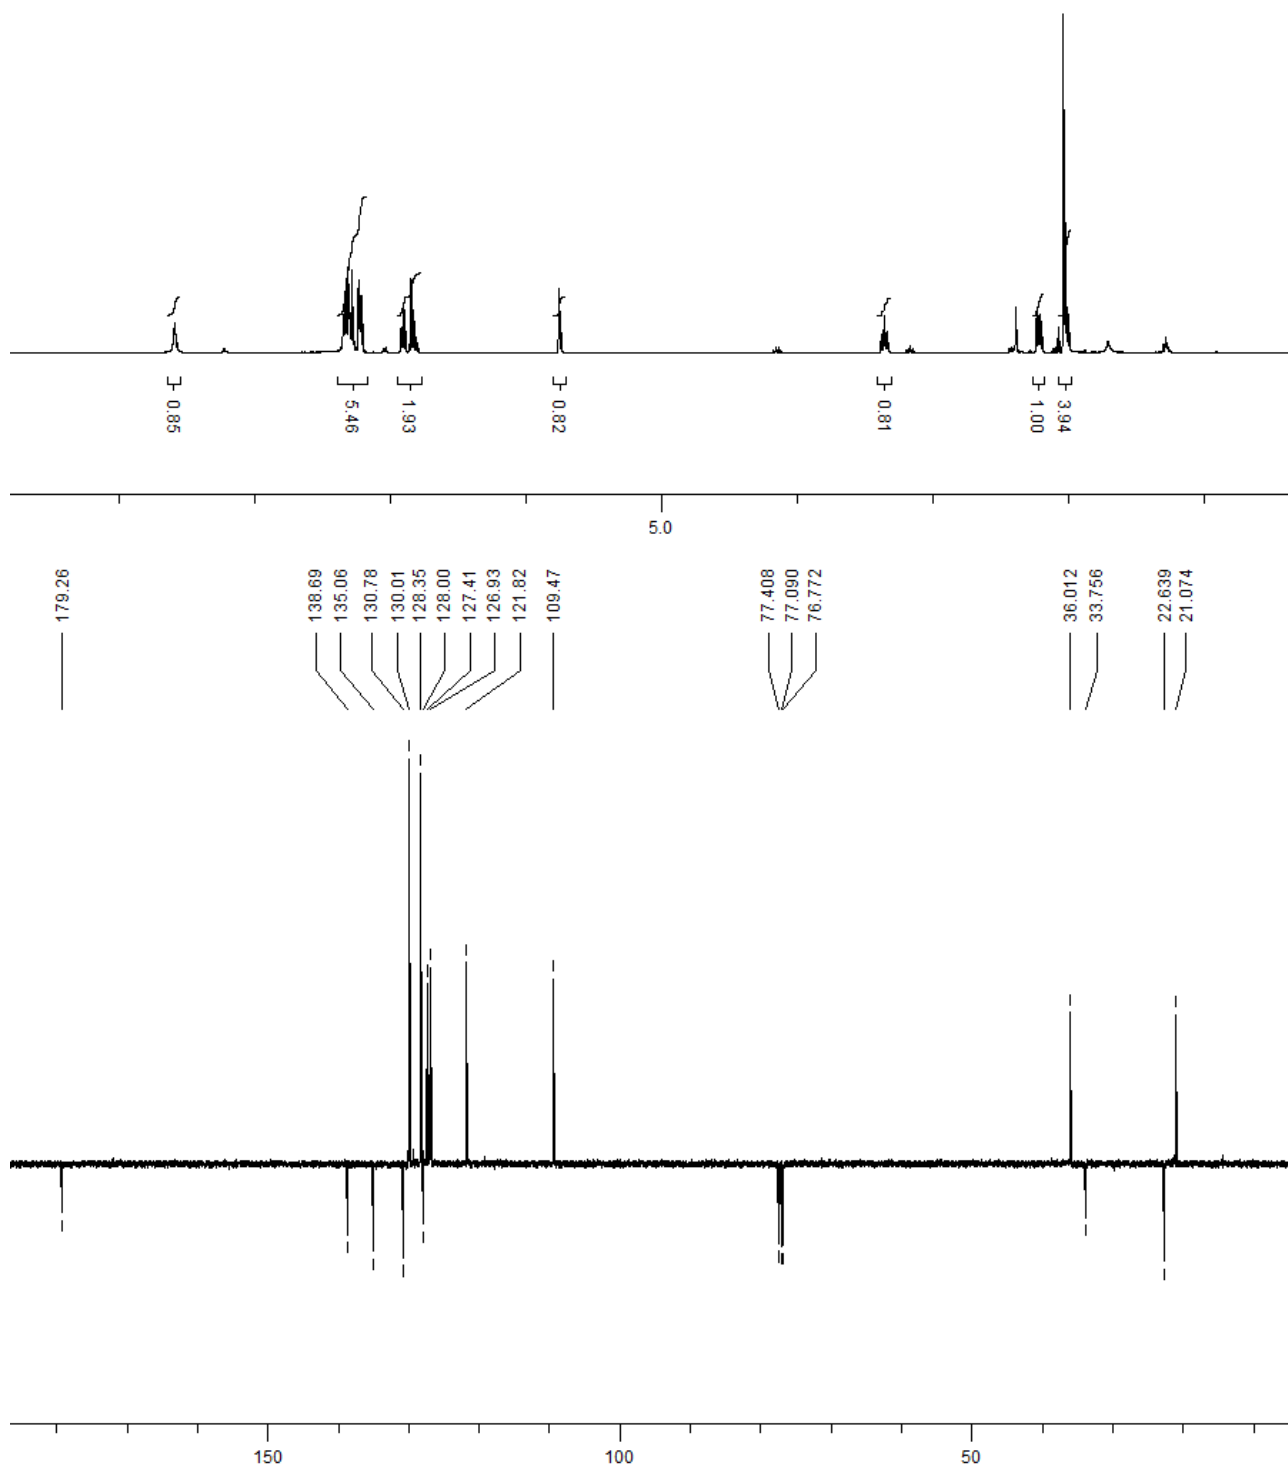

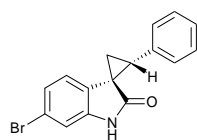

**3o** d.r.>99:1

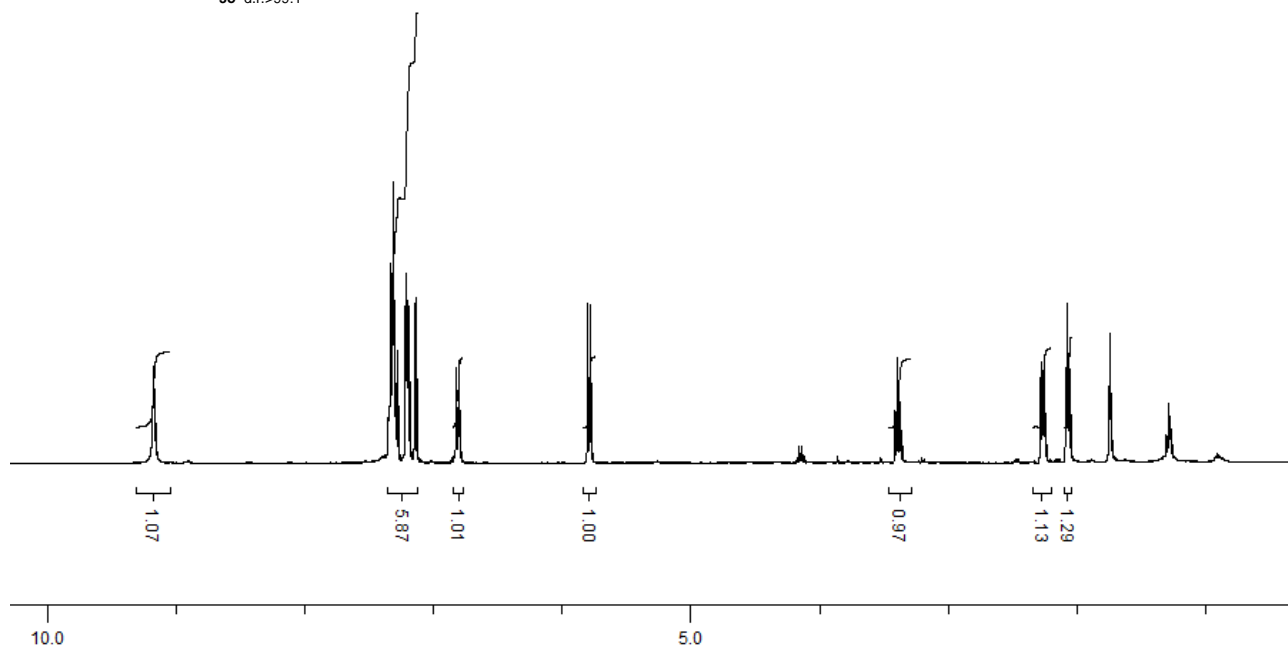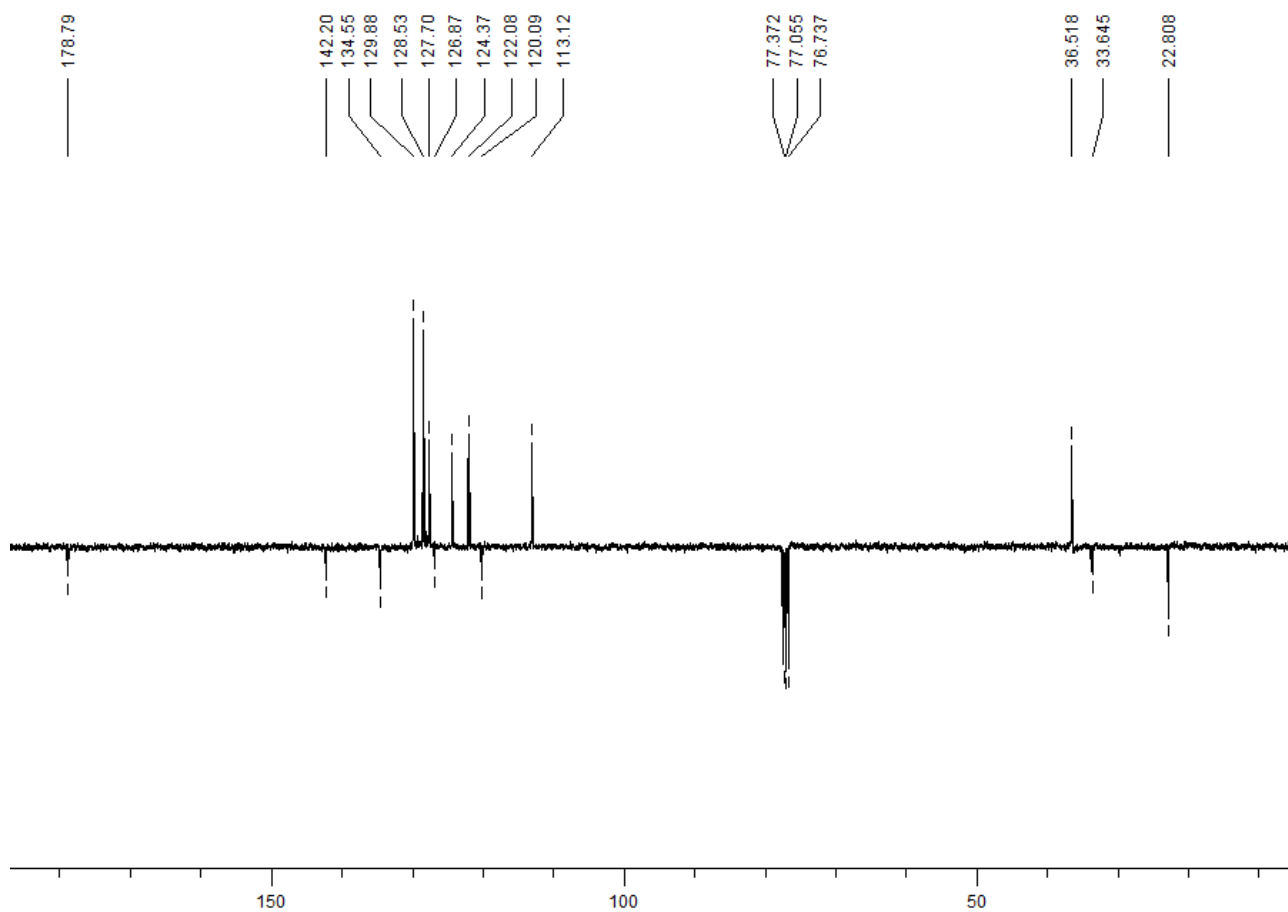



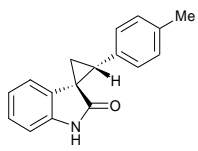

3p d.r. >99:1

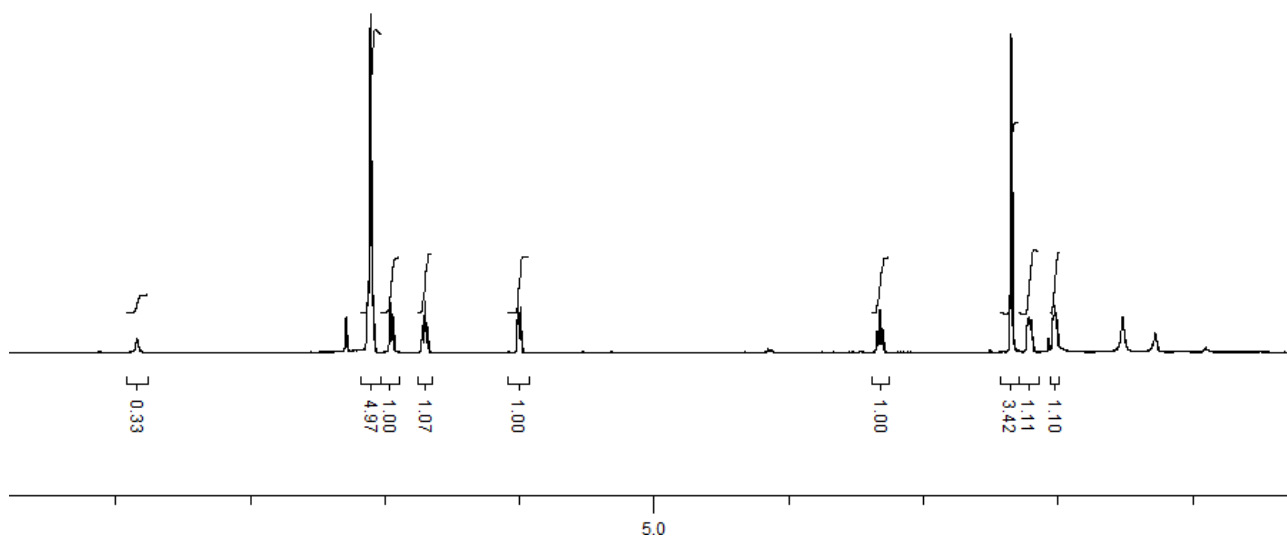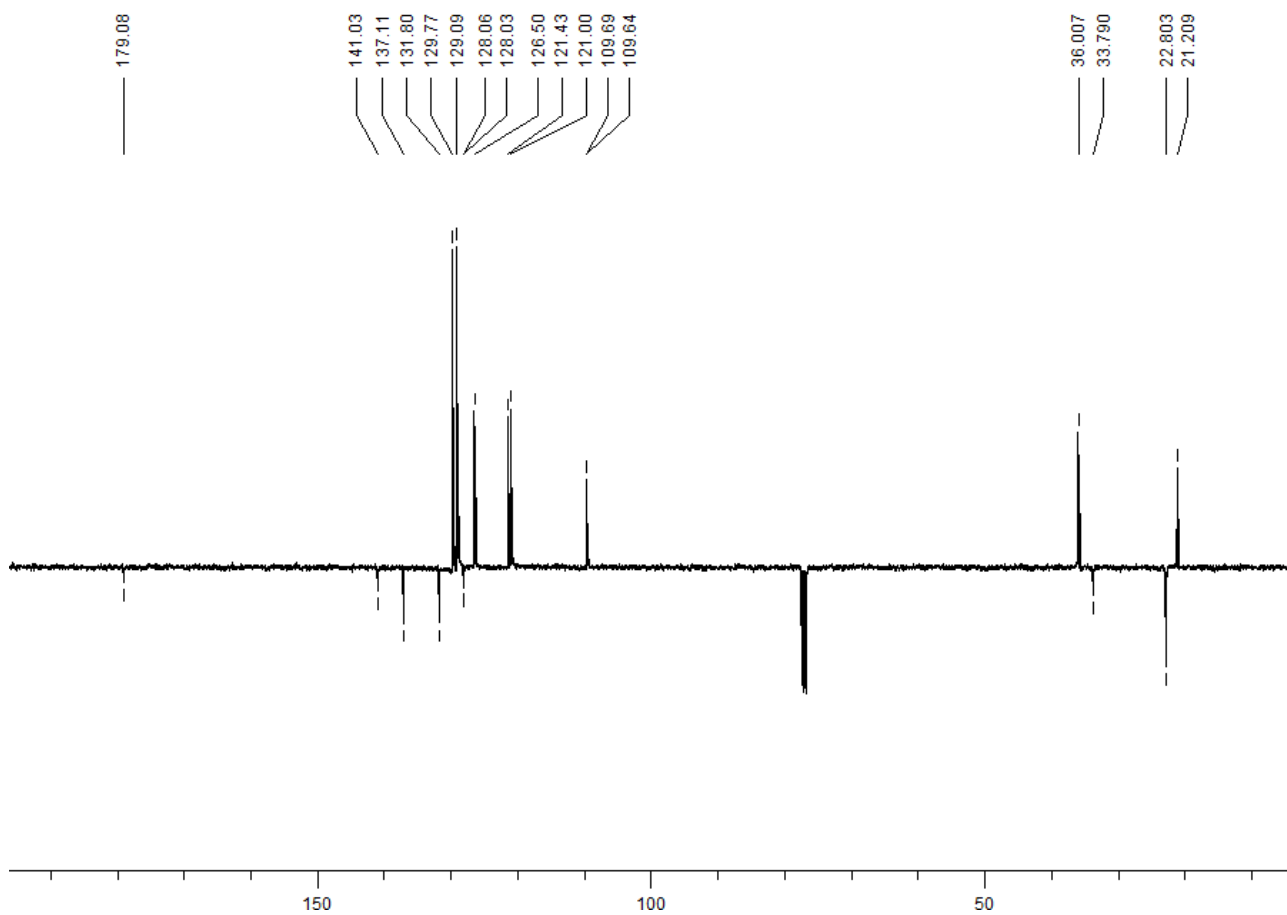

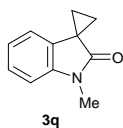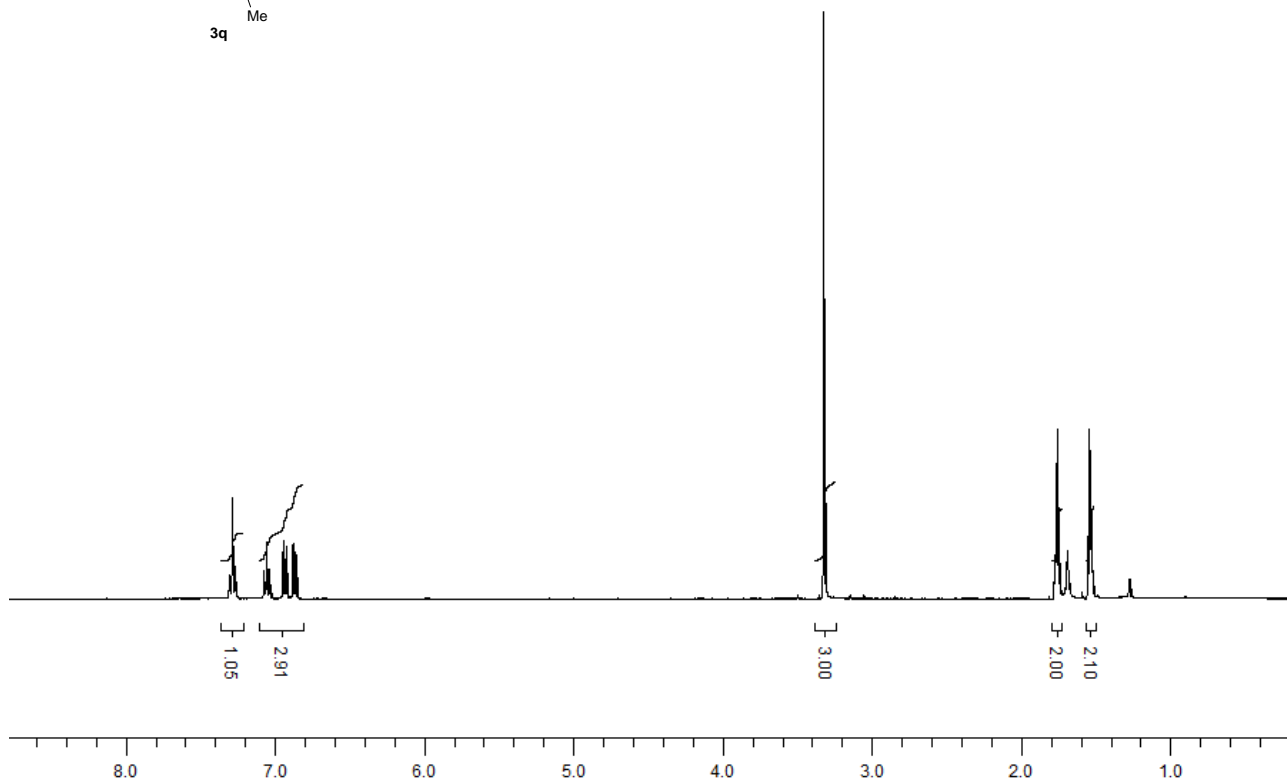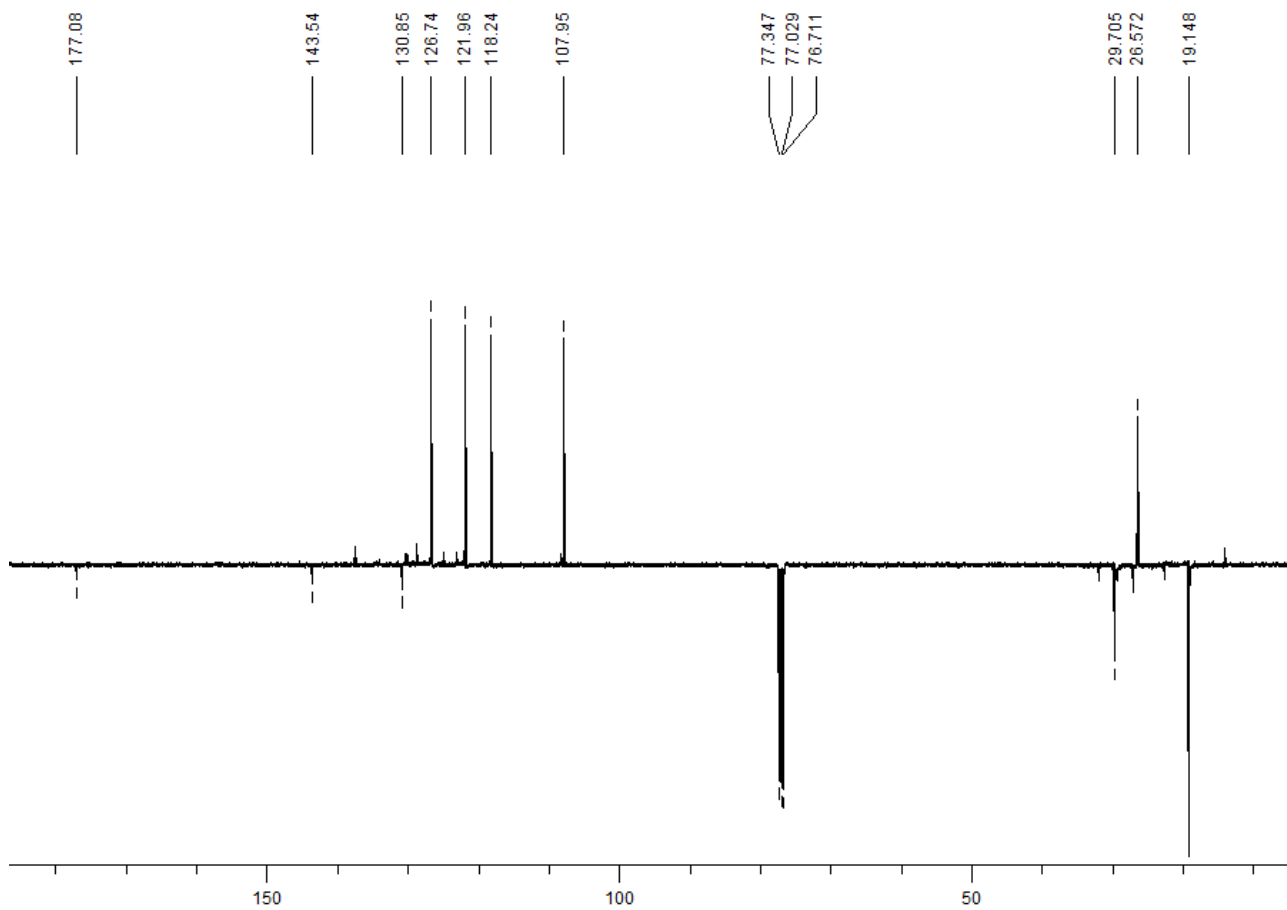

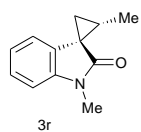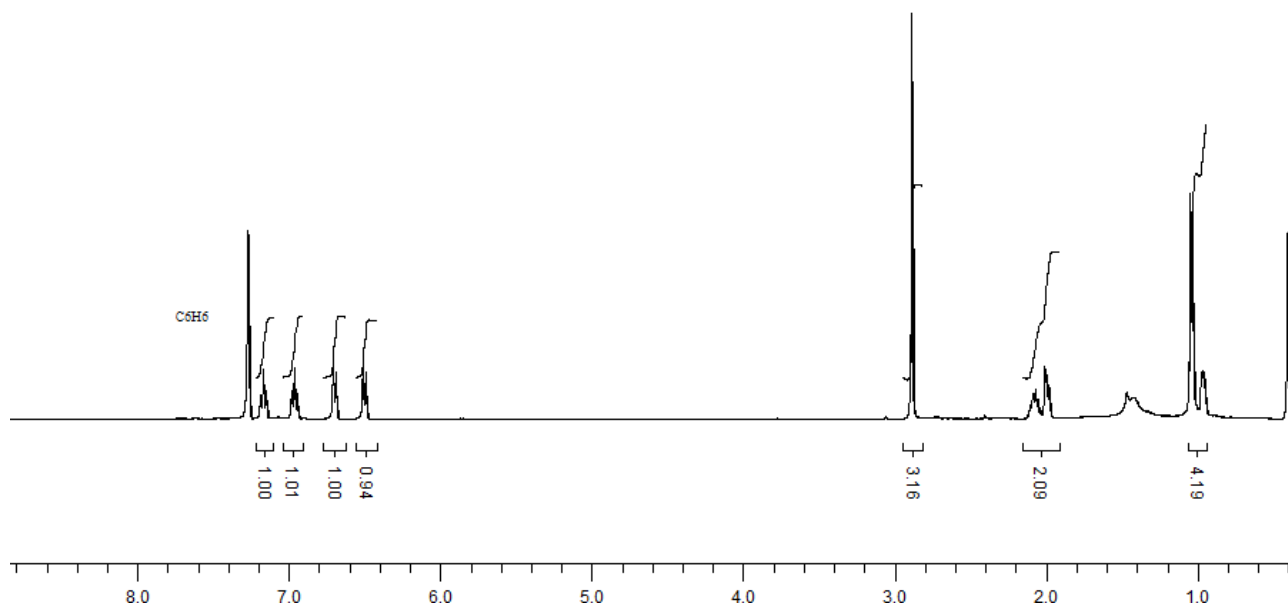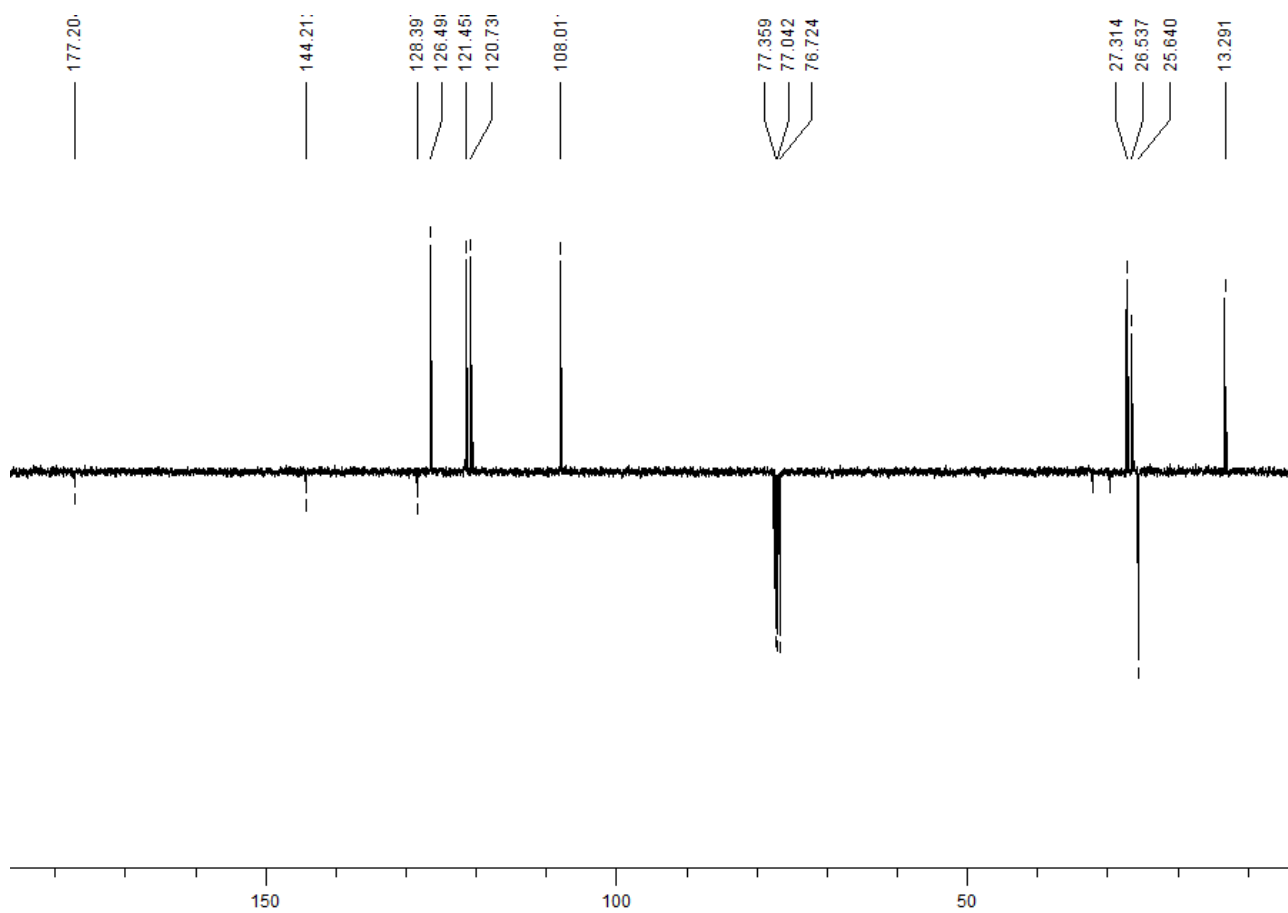

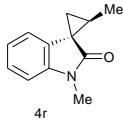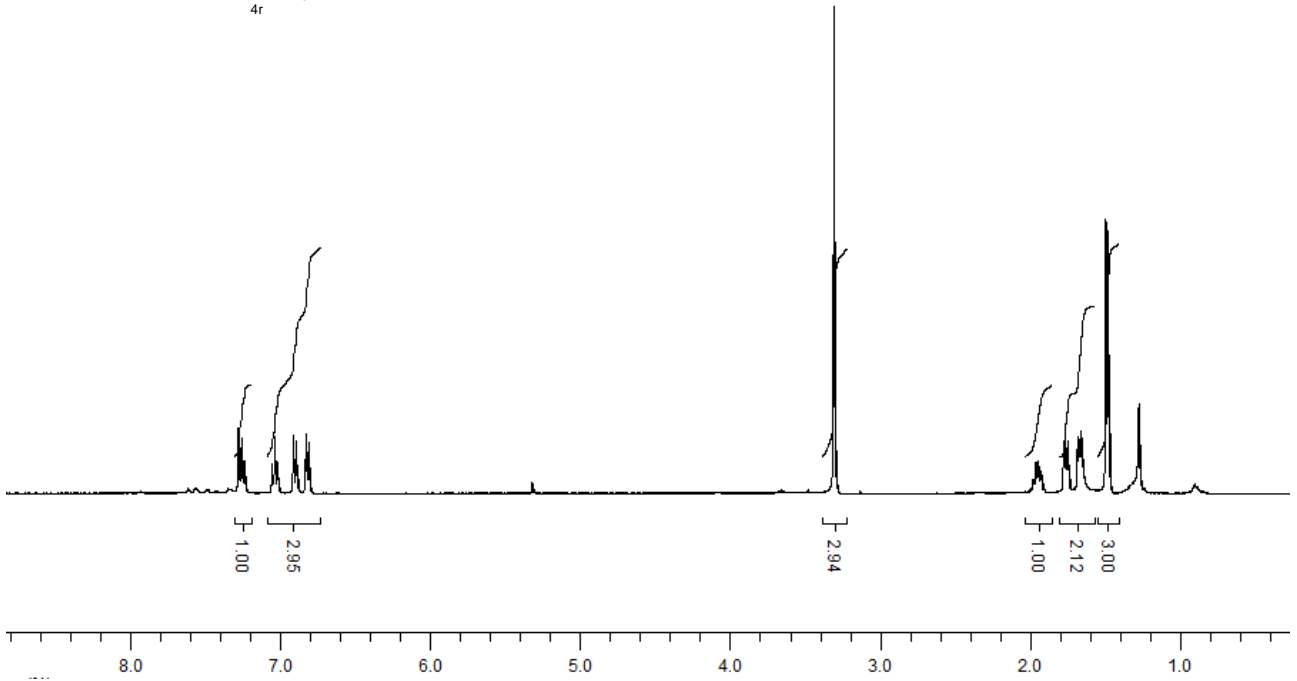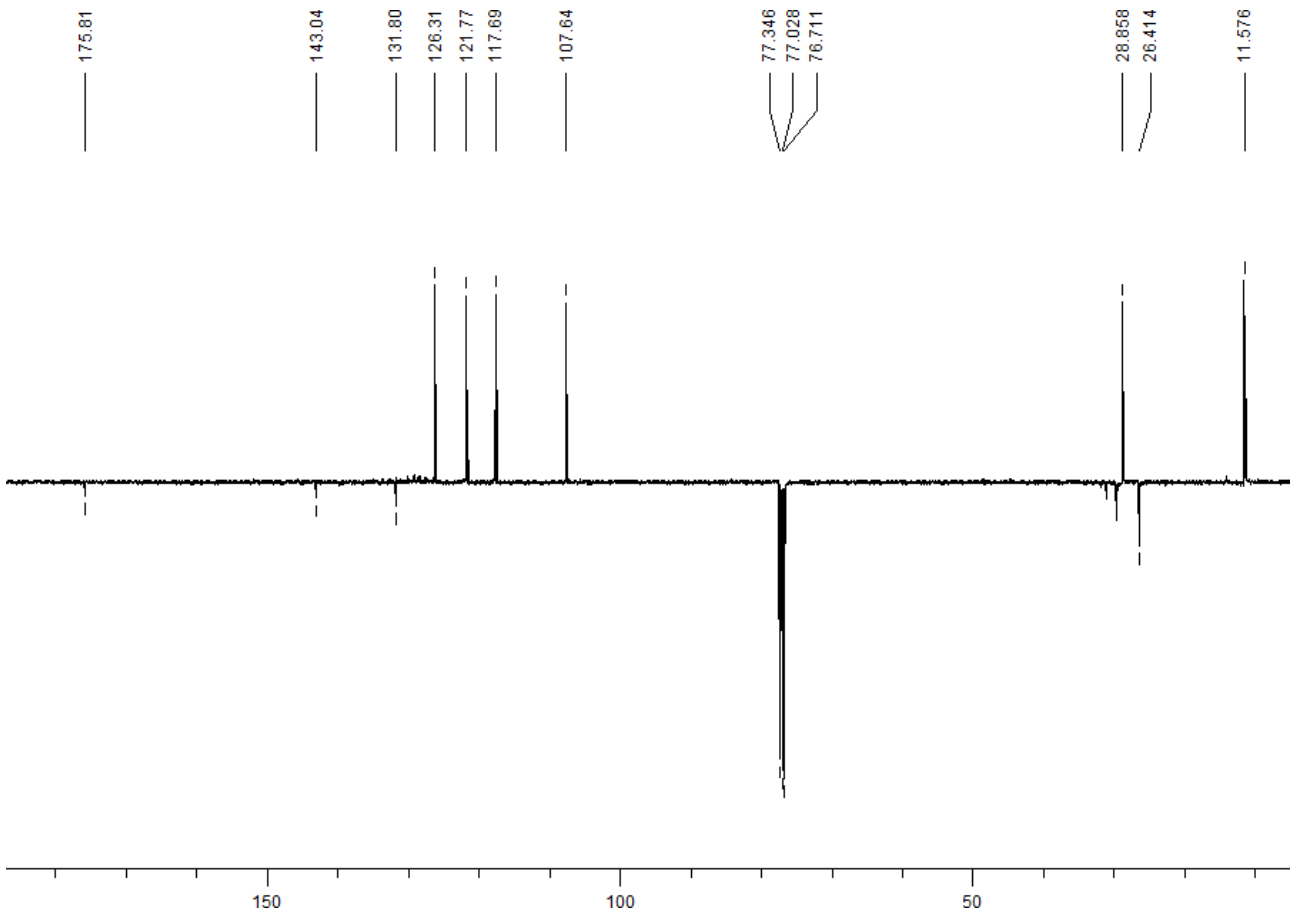

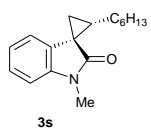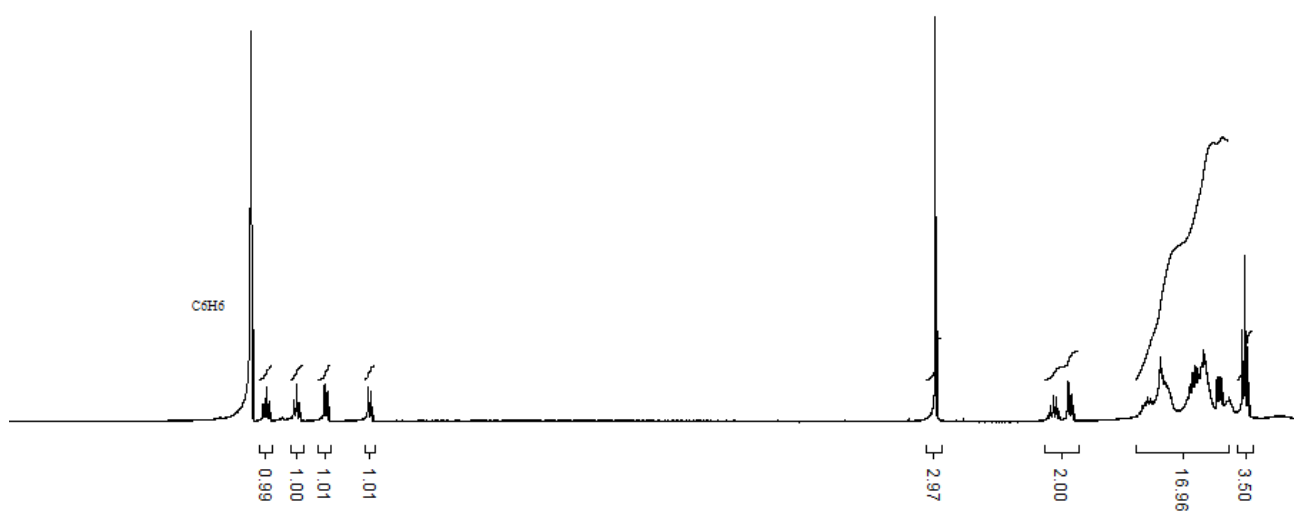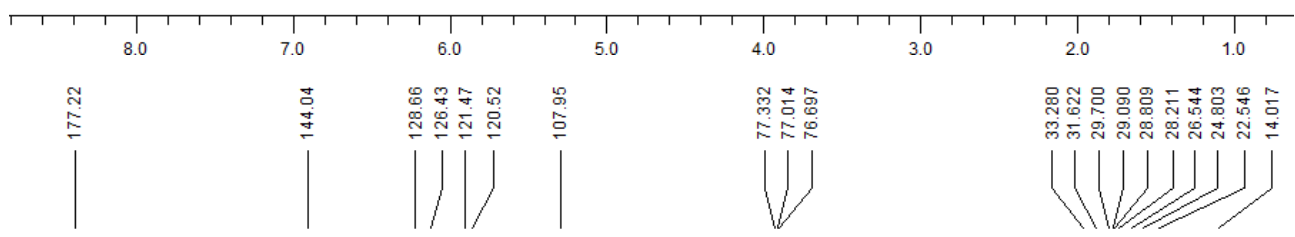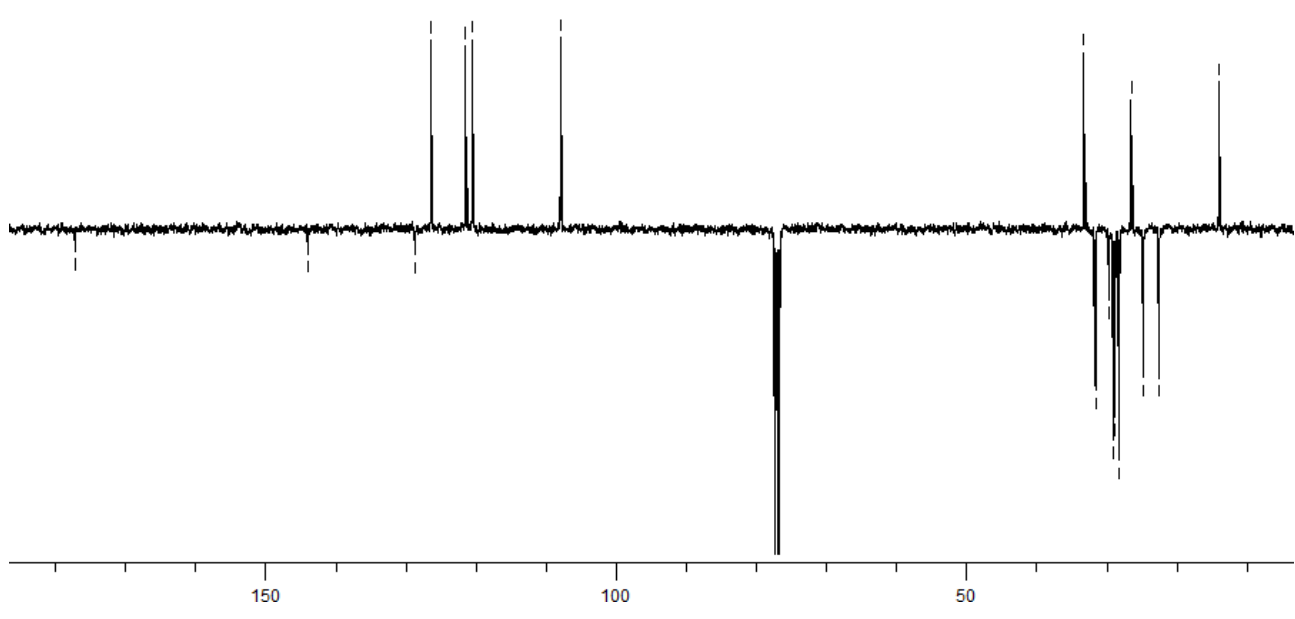

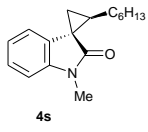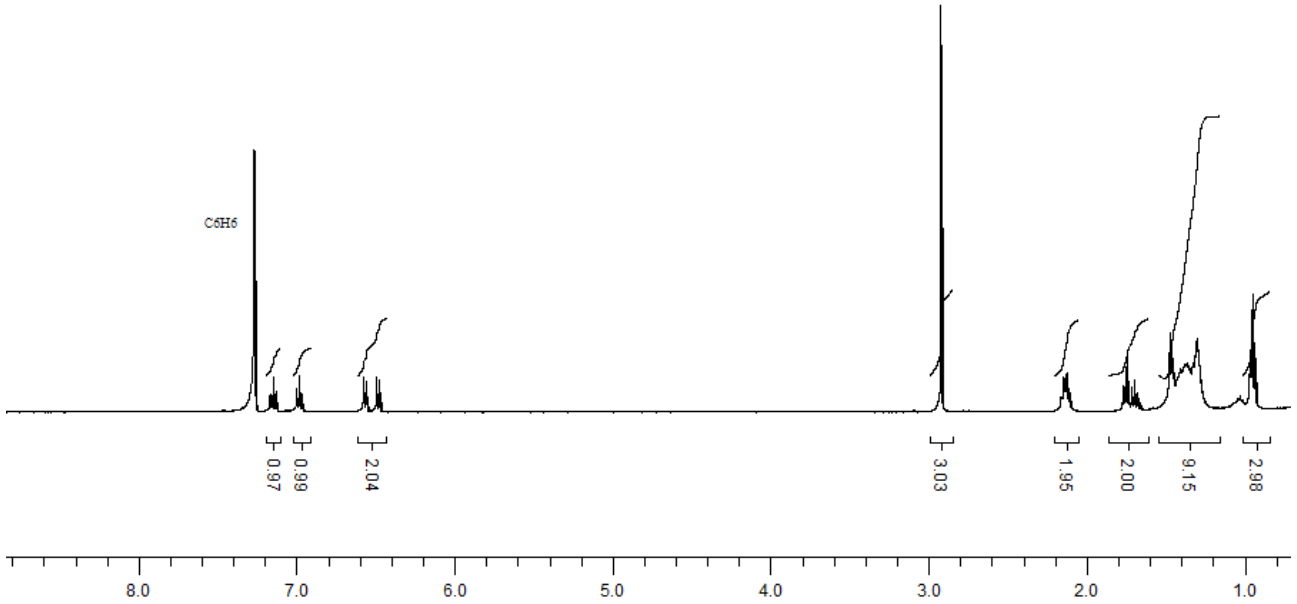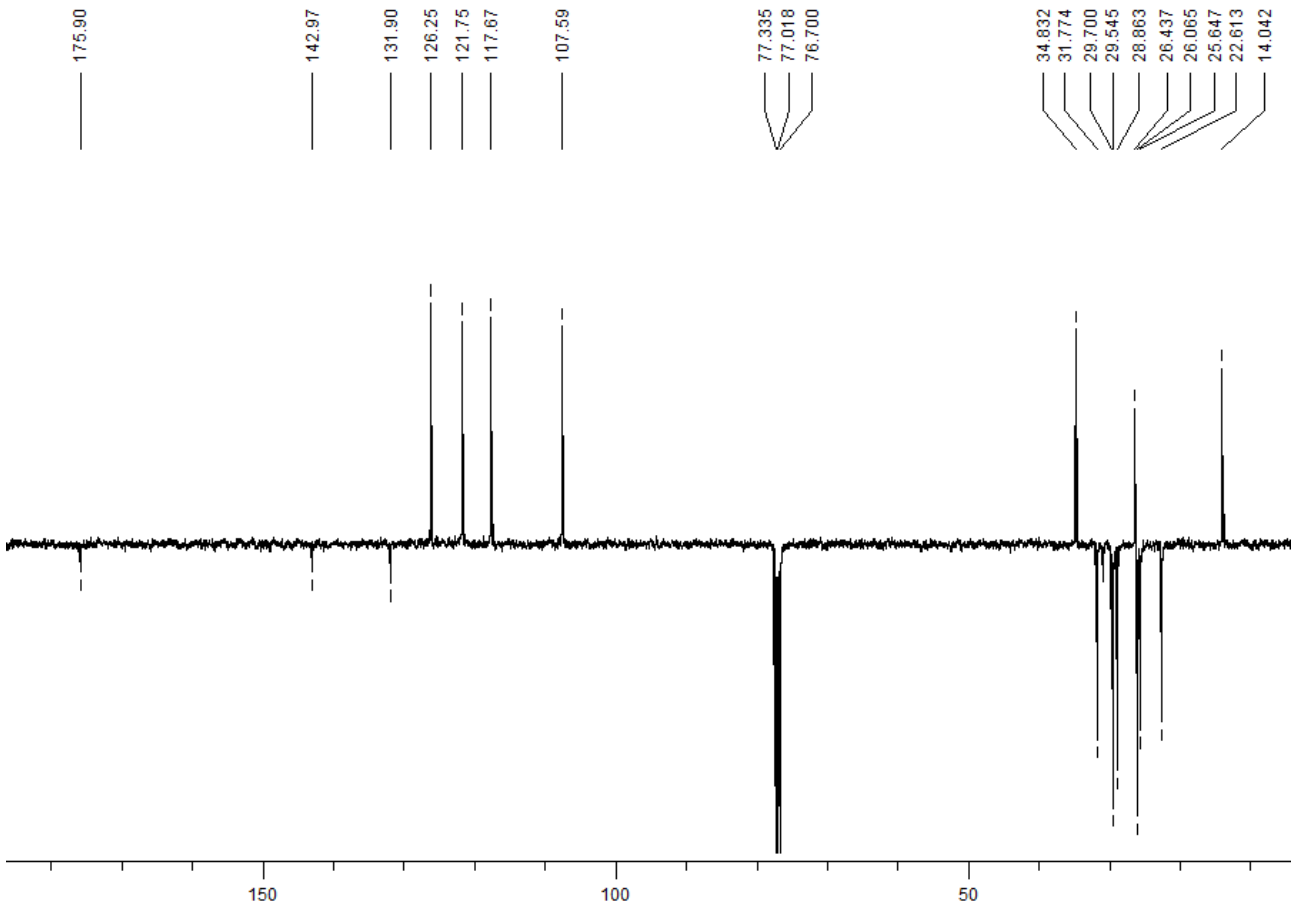

NOESY of compound **3r** (400MHz, C<sub>6</sub>D<sub>6</sub>)

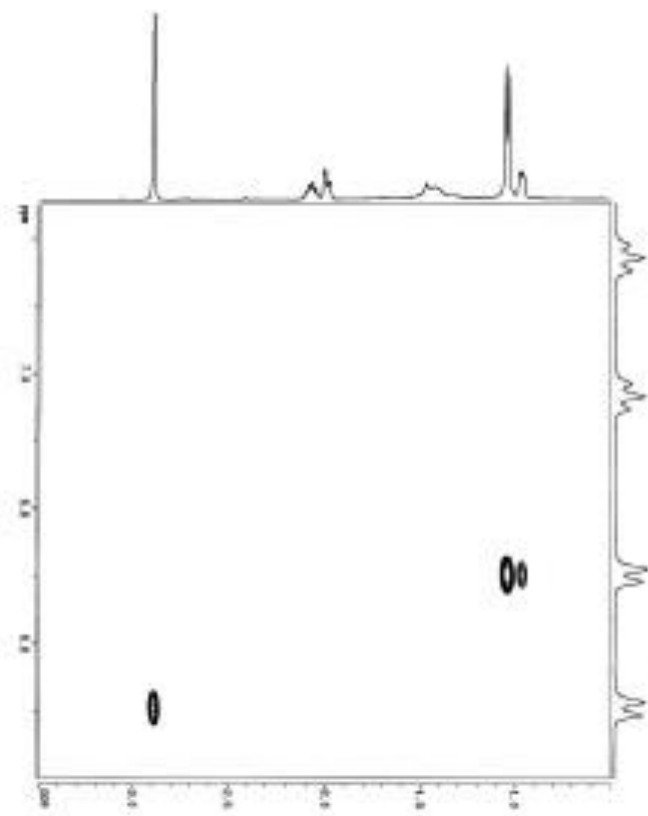

NOESY of compound **4r** (400MHz, CDCl<sub>3</sub>)

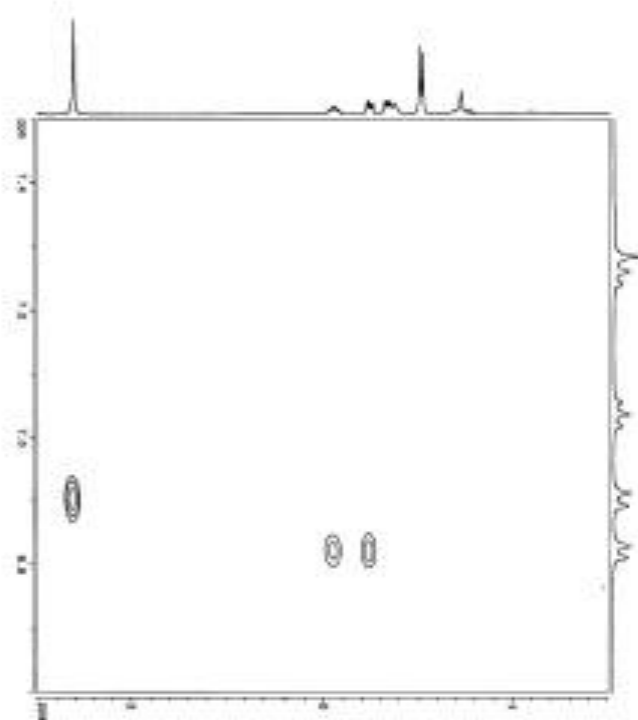

HETCOR of compound **3s** (400MHz, C<sub>6</sub>D<sub>6</sub>)

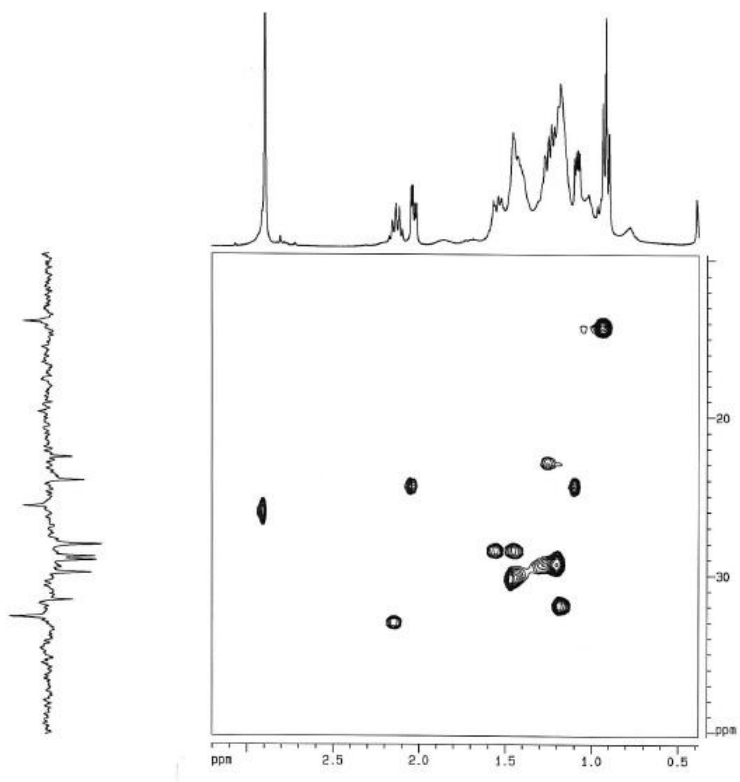

HETCOR of compound **4s** (400MHz, C<sub>6</sub>D<sub>6</sub>)

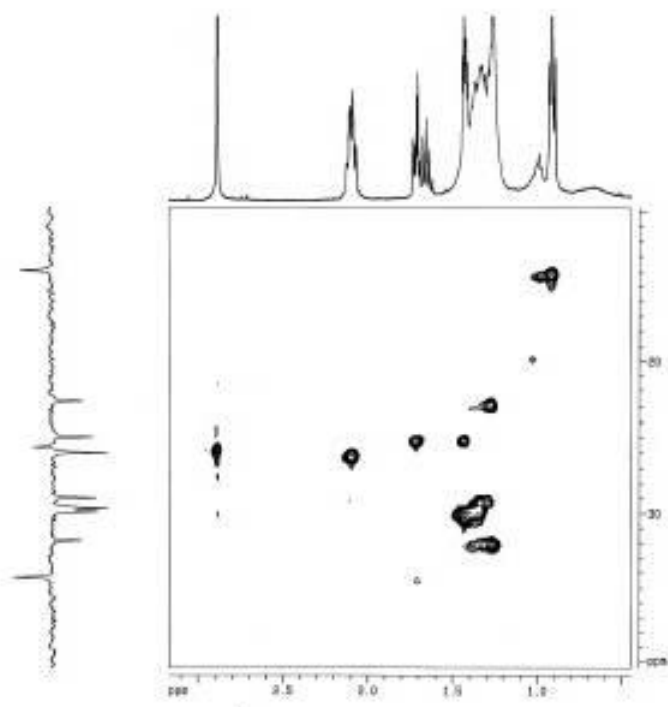



NOESY of compound **3s** (400MHz, C<sub>6</sub>D<sub>6</sub>)

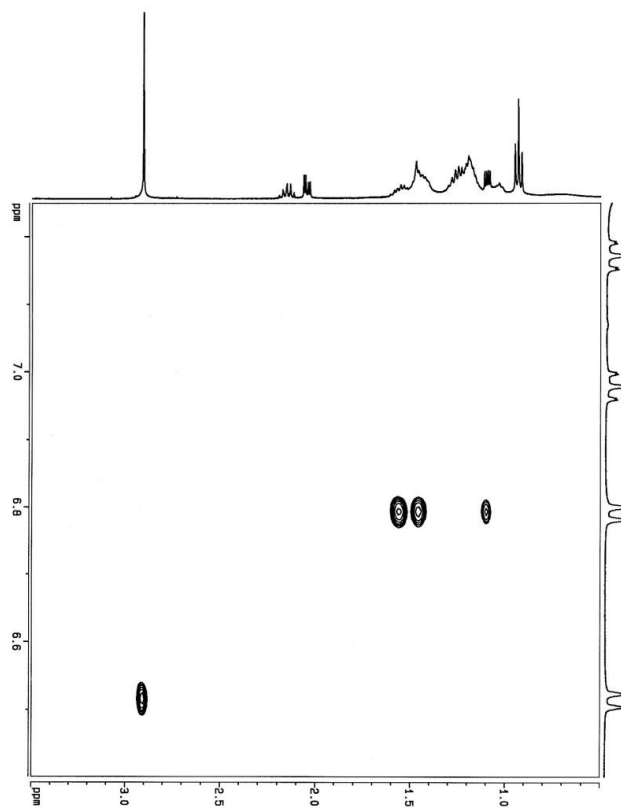

NOESY of compound **4s** (400MHz, C<sub>6</sub>D<sub>6</sub>)

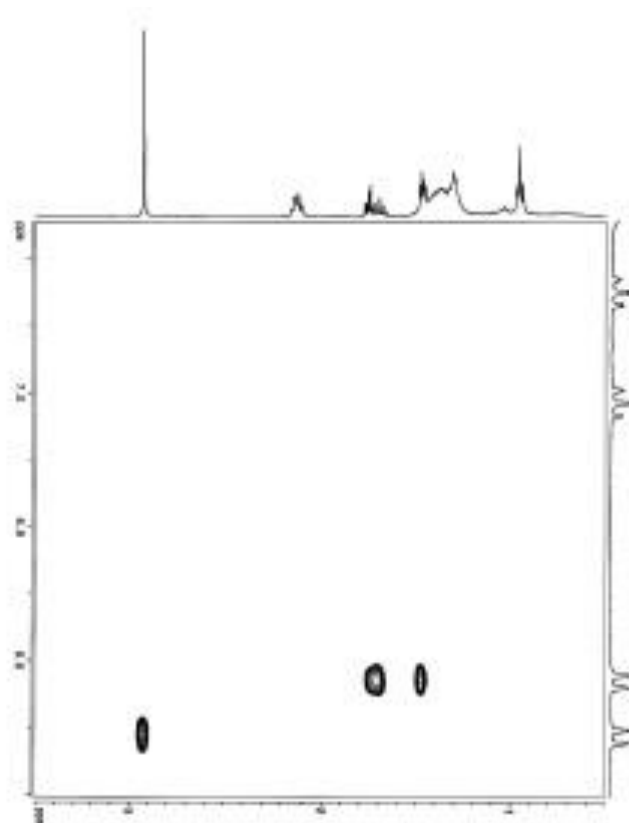

Supplement: c5ob02451j1.pdf [file c5ob02451j1.pdf]
